# Supplementary material for: High resolution profiling of coral-associated bacterial communities using full-length 16S rRNA sequence data from PacBio SMRT sequencing system
Source: PubMed Central journal article supplement (PMC5459821; doi:10.1038/s41598-017-03139-4), 2017-06-05
Supplement: 41598_2017_3139_MOESM1_ESM.pdf [file 41598_2017_3139_MOESM1_ESM.pdf]

## Supplementary Information

### High resolution profiling of coral-associated bacterial communities using full-length 16S rRNA sequence data from PacBio SMRT sequencing system

Wirulda Pootakham<sup>1,\*</sup>, Wuttichai Mhuantong<sup>1</sup>, Thippawan Yoocha<sup>1</sup>, Lalita Putchim<sup>2</sup>, Chutima Sonthirod<sup>1</sup>, Chaiwat Naktang<sup>1</sup>, Nalinee Thongtham<sup>2</sup> and Sithichoke Tangphatsornruang<sup>1</sup>.

<sup>1</sup>National Center for Genetic Engineering and Biotechnology (BIOTEC), National Science and Technology Development Agency, Pathum Thani, Thailand

<sup>2</sup>Phuket Marine Biological Center, Phuket, 83000, Thailand

#### \*Corresponding author

Wirulda Pootakham

National Center for Genetic Engineering and Biotechnology (BIOTEC), 113 Thailand Science Park, Phahonyothin Rd, Khlong Nueng, Khlong Luang, Pathum Thani, Thailand 12120

Email address: [wirulda@alumni.stanford.edu](mailto:wirulda@alumni.stanford.edu)

Phone: 66 2 564 6700 ext 3548

**Supplementary Table S1.** A list of indicator species significantly ( $P < 0.05$ ) associated with corals from particular location (MN, Mannai; TA, Tao; TL, Talu; MT, Maiton; TC, Tachai) as revealed by the indicator value (INDVAL) analysis. The analysis showed that none of the bacterial species was significantly associated with coral samples from SM.

| Location                      | Indicator species                                                                               | Taxonomy                            | Index value                                                                                          | P-value |       |
|-------------------------------|-------------------------------------------------------------------------------------------------|-------------------------------------|------------------------------------------------------------------------------------------------------|---------|-------|
| Gulf of Thailand              | MN                                                                                              | <i>Aliiroseovarius crassostreae</i> | Bacteria;Proteobacteria;Alphaproteobacteria;Rhodobacterales;Rhodobacteraceae;Aliiroseovarius         | 1.00    | 0.008 |
|                               |                                                                                                 | <i>Arcobacter defluvii</i>          | Bacteria;Proteobacteria;Epsilonproteobacteria;Campylobacterales;Campylobacteraceae;Arcobacter        | 1.00    | 0.009 |
|                               |                                                                                                 | <i>Arcobacter halophilus</i>        | Bacteria;Proteobacteria;Epsilonproteobacteria;Campylobacterales;Campylobacteraceae;Arcobacter        | 1.00    | 0.006 |
|                               |                                                                                                 | <i>Halobacteriovorax litoralis</i>  | Bacteria;Proteobacteria;Deltaproteobacteria;Bdellovibrionales;Halobacteriovoraceae;Halobacteriovorax | 1.00    | 0.009 |
|                               |                                                                                                 | <i>Leisingera aquimarina</i>        | Bacteria;Proteobacteria;Alphaproteobacteria;Rhodobacterales;Rhodobacteraceae;Leisingera              | 1.00    | 0.006 |
|                               |                                                                                                 | <i>Litoribrevibacter albus</i>      | Bacteria;Proteobacteria;Gammaproteobacteria;Oceanospirillales;Oceanospirillaceae;Litoribrevibacter   | 1.00    | 0.007 |
|                               |                                                                                                 | <i>Marinifilum fragile</i>          | Bacteria;Bacteroidetes;Bacteroidia;Bacteroidales;Marinifilaceae;Marinifilum                          | 1.00    | 0.003 |
|                               |                                                                                                 | <i>Photobacterium angustum</i>      | Bacteria;Proteobacteria;Gammaproteobacteria;Vibrionales;Vibrionaceae;Photobacterium                  | 1.00    | 0.007 |
|                               |                                                                                                 | <i>Roseovarius aestuarii</i>        | Bacteria;Proteobacteria;Alphaproteobacteria;Rhodobacterales;Rhodobacteraceae;Roseovarius             | 1.00    | 0.006 |
|                               |                                                                                                 | <i>Tenacibaculum gallicaicum</i>    | Bacteria;Bacteroidetes;Flavobacteriia;Flavobacteriales;Flavobacteriaceae;Tenacibaculum               | 1.00    | 0.006 |
|                               |                                                                                                 | <i>Thalassobius aestuarii</i>       | Bacteria;Proteobacteria;Alphaproteobacteria;Rhodobacterales;Rhodobacteraceae;Thalassobius            | 1.00    | 0.007 |
|                               |                                                                                                 | <i>Tropicibacter mediterraneus</i>  | Bacteria;Proteobacteria;Alphaproteobacteria;Rhodobacterales;Rhodobacteraceae;Tropicibacter           | 1.00    | 0.013 |
|                               |                                                                                                 | <i>Tropicibacter multivorans</i>    | Bacteria;Proteobacteria;Alphaproteobacteria;Rhodobacterales;Rhodobacteraceae;Tropicibacter           | 1.00    | 0.017 |
|                               |                                                                                                 | <i>Vallitalea guaymasensis</i>      | Bacteria;Firmicutes;Clostridia;Clostridiales;Defluviitaleaceae;Vallitalea                            | 1.00    | 0.003 |
|                               |                                                                                                 | <i>Fusibacter paucivorans</i>       | Bacteria;Firmicutes;Clostridia;Clostridiales;Clostridialesincertaesedis;Clostridiales;Fusibacter     | 1.00    | 0.009 |
|                               |                                                                                                 | <i>Shimia isopora</i>               | Bacteria;Proteobacteria;Alphaproteobacteria;Rhodobacterales;Rhodobacteraceae;Shimia                  | 1.00    | 0.013 |
|                               |                                                                                                 | <i>Thalassobius mediterraneus</i>   | Bacteria;Proteobacteria;Alphaproteobacteria;Rhodobacterales;Rhodobacteraceae;Thalassobius            | 1.00    | 0.011 |
|                               |                                                                                                 | <i>Arcobacter butzleri</i>          | Bacteria;Proteobacteria;Epsilonproteobacteria;Campylobacterales;Campylobacteraceae;Arcobacter        | 1.00    | 0.009 |
|                               |                                                                                                 | <i>Vallitalea pronyensis</i>        | Bacteria;Firmicutes;Clostridia;Clostridiales;Defluviitaleaceae;Vallitalea                            | 1.00    | 0.007 |
|                               |                                                                                                 | <i>Arcobacter bivalviorum</i>       | Bacteria;Proteobacteria;Epsilonproteobacteria;Campylobacterales;Campylobacteraceae;Arcobacter        | 0.99    | 0.008 |
|                               |                                                                                                 | <i>Arcobacter nitrofigilis</i>      | Bacteria;Proteobacteria;Epsilonproteobacteria;Campylobacterales;Campylobacteraceae;Arcobacter        | 0.99    | 0.006 |
|                               |                                                                                                 | <i>Oceanirhabdus sediminicola</i>   | Bacteria;Firmicutes;Clostridia;Clostridiales;Clostridiaceae;Oceanirhabdus                            | 0.99    | 0.008 |
|                               |                                                                                                 | <i>Aestuariuspira insulae</i>       | Bacteria;Proteobacteria;Alphaproteobacteria;Rhodospirillales;Rhodospirillaceae;Aestuariuspira        | 0.98    | 0.008 |
|                               |                                                                                                 | <i>Shimia marina</i>                | Bacteria;Proteobacteria;Alphaproteobacteria;Rhodobacterales;Rhodobacteraceae;Shimia                  | 0.98    | 0.007 |
| <i>Marinifilum flexuosum</i>  | Bacteria;Bacteroidetes;Bacteroidia;Bacteroidales;Marinifilaceae;Marinifilum                     | 0.98                                | 0.011                                                                                                |         |       |
| <i>Thalassolituus marinus</i> | Bacteria;Proteobacteria;Gammaproteobacteria;Oceanospirillales;Oceanospirillaceae;Thalassolituus | 0.98                                | 0.007                                                                                                |         |       |

|                |    |                                          |                                                                                                      |      |       |
|----------------|----|------------------------------------------|------------------------------------------------------------------------------------------------------|------|-------|
|                |    | <i>Tenacibaculum litopenaei</i>          | Bacteria;Bacteroidetes;Flavobacteriia;Flavobacteriales;Flavobacteriaceae;Tenacibaculum               | 0.97 | 0.012 |
|                |    | <i>Vibrio gallaecicus</i>                | Bacteria;Proteobacteria;Gammaproteobacteria;Vibrionales;Vibrionaceae;Vibrio                          | 0.95 | 0.019 |
|                |    | <i>Marinobacterium stanieri</i>          | Bacteria;Proteobacteria;Gammaproteobacteria;Oceanospirillales;Oceanospirillaceae;Marinobacterium     | 0.95 | 0.004 |
|                |    | <i>Neptunomonas antarctica</i>           | Bacteria;Proteobacteria;Gammaproteobacteria;Oceanospirillales;Oceanospirillaceae;Neptunomonas        | 0.93 | 0.016 |
|                |    | <i>Thalassobius maritimus</i>            | Bacteria;Proteobacteria;Alphaproteobacteria;Rhodobacterales;Rhodobacteraceae;Thalassobius            | 0.93 | 0.009 |
|                | TA | <i>Vibrio crassostreae</i>               | Bacteria;Proteobacteria;Gammaproteobacteria;Vibrionales;Vibrionaceae;Vibrio                          | 1.00 | 0.006 |
|                |    | <i>Pseudoalteromonas phenolica</i>       | Bacteria;Proteobacteria;Gammaproteobacteria;Alteromonadales;Pseudoalteromonadaceae;Pseudoalteromonas | 0.96 | 0.009 |
|                |    | <i>Vibrio coralliilyticus</i>            | Bacteria;Proteobacteria;Gammaproteobacteria;Vibrionales;Vibrionaceae;Vibrio                          | 0.93 | 0.009 |
|                |    | <i>Pseudoalteromonas luteoviolacea</i>   | Bacteria;Proteobacteria;Gammaproteobacteria;Alteromonadales;Pseudoalteromonadaceae;Pseudoalteromonas | 0.92 | 0.006 |
|                |    | <i>Psychrosphaera saromensis</i>         | Proteobacteria;Gammaproteobacteria;Alteromonadales;Pseudoalteromonadaceae;Psychrosphaera             | 0.88 | 0.017 |
|                |    | <i>Vibrio caribbeanicus</i>              | Bacteria;Proteobacteria;Gammaproteobacteria;Vibrionales;Vibrionaceae;Vibrio                          | 0.88 | 0.013 |
|                |    | <i>Vibrio hepatarius</i>                 | Bacteria;Proteobacteria;Gammaproteobacteria;Vibrionales;Vibrionaceae;Vibrio;Vibrioreintalisgroup     | 0.87 | 0.048 |
|                |    | <i>Thalassotalea ponticola</i>           | Bacteria;Proteobacteria;Gammaproteobacteria;Alteromonadales;Colwelliaceae;Thalassotalea              | 0.87 | 0.008 |
|                |    | <i>Psychrosphaera aestuarii</i>          | Bacteria;Proteobacteria;Gammaproteobacteria;Alteromonadales;Pseudoalteromonadaceae;Psychrosphaera    | 0.83 | 0.015 |
|                |    | <i>Pseudoalteromonas piscicida</i>       | Bacteria;Proteobacteria;Gammaproteobacteria;Alteromonadales;Pseudoalteromonadaceae;Pseudoalteromonas | 0.82 | 0.012 |
|                |    | <i>Shewanella corallii</i>               | Bacteria;Proteobacteria;Gammaproteobacteria;Alteromonadales;Shewanellaceae;Shewanella                | 0.81 | 0.016 |
|                | TL | <i>Alteromonas marina</i>                | Bacteria;Proteobacteria;Gammaproteobacteria;Alteromonadales;Alteromonadaceae;Alteromonas             | 0.93 | 0.01  |
|                |    | <i>Pseudoalteromonas shioyasakiensis</i> | Bacteria;Proteobacteria;Gammaproteobacteria;Alteromonadales;Pseudoalteromonadaceae;Pseudoalteromonas | 0.84 | 0.013 |
|                |    | <i>Pseudoalteromonas mariniglutinos</i>  | Bacteria;Proteobacteria;Gammaproteobacteria;Alteromonadales;Pseudoalteromonadaceae;Pseudoalteromonas | 0.84 | 0.015 |
|                |    | <i>Pseudoalteromonas lipolytica</i>      | Bacteria;Proteobacteria;Gammaproteobacteria;Alteromonadales;Pseudoalteromonadaceae;Pseudoalteromonas | 0.81 | 0.014 |
|                |    | <i>Pseudoalteromonas antarctica</i>      | Bacteria;Proteobacteria;Gammaproteobacteria;Alteromonadales;Pseudoalteromonadaceae;Pseudoalteromonas | 0.80 | 0.008 |
| Andaman<br>Sea | MT | <i>Agrococcus jenensis</i>               | Bacteria;Actinobacteria;Actinobacteria;Micrococcales;Microbacteriaceae;Agrococcus                    | 1.00 | 0.009 |
|                |    | <i>Brevundimonas nasdae</i>              | Bacteria;Proteobacteria;Alphaproteobacteria;Caulobacterales;Caulobacteraceae;Brevundimonas           | 1.00 | 0.003 |
|                |    | <i>Methylobacterium populi</i>           | Bacteria;Proteobacteria;Alphaproteobacteria;Rhizobiales;Methylobacteriaceae;Methylobacterium         | 1.00 | 0.012 |
|                |    | <i>Acinetobacter schindleri</i>          | Bacteria;Proteobacteria;Gammaproteobacteria;Pseudomonadales;Moraxellaceae;Acinetobacter              | 0.99 | 0.017 |
|                |    | <i>Bradyrhizobium japonicum</i>          | Bacteria;Proteobacteria;Alphaproteobacteria;Rhizobiales;Bradyrhizobiaceae;Bradyrhizobium             | 0.90 | 0.011 |
|                |    | <i>Bradyrhizobium diazoefficiens</i>     | Bacteria;Proteobacteria;Alphaproteobacteria;Rhizobiales;Bradyrhizobiaceae;Bradyrhizobium             | 0.84 | 0.009 |
|                | TC | <i>Burkholderia stabilis</i>             | Bacteria;Proteobacteria;Betaproteobacteria;Burkholderiales;Burkholderiaceae;Burkholderia             | 1.00 | 0.008 |
|                |    | <i>Heliomonas saccharivorans</i>         | Bacteria;Bacteroidetes;Chitinophagia;Chitinophagales;Chitinophagaceae;Heliimonas                     | 1.00 | 0.012 |
|                |    | <i>Devosia insulae</i>                   | Bacteria;Proteobacteria;Alphaproteobacteria;Rhizobiales;Hyphomicrobiaceae;Devosia                    | 0.98 | 0.006 |

**Supplementary Table S2.** A list of candidate members of the *P. lutea* core microbiome (at 50% sample coverage), their relative abundance (average species abundance across all *P. lutea* samples) and their average ubiquity (percentages of *P. lutea* samples in which the species was detected).

| Species                                  | Taxonomy                                                                                             | Relative abundance | Average ubiquity |
|------------------------------------------|------------------------------------------------------------------------------------------------------|--------------------|------------------|
| <i>Endozoicomonas elysicola</i>          | Bacteria;Proteobacteria;Gammaproteobacteria;Oceanospirillales;Hahellaceae;Endozoicomonas             | 21.340%            | 100%             |
| <i>Endozoicomonas euniceicola</i>        | Bacteria;Proteobacteria;Gammaproteobacteria;Oceanospirillales;Hahellaceae;Endozoicomonas             | 17.399%            | 100%             |
| <i>Pseudoalteromonas shioyasakiensis</i> | Bacteria;Proteobacteria;Gammaproteobacteria;Alteromonadales;Pseudoalteromonadaceae;Pseudoalteromonas | 6.637%             | 94%              |
| <i>Sediminibacterium salmoneum</i>       | Bacteria;Bacteroidetes;Chitinophagia;Chitinophagales;Chitinophagaceae;Sediminibacterium              | 4.336%             | 100%             |
| <i>Reyranela massiliensis</i>            | Bacteria;Proteobacteria;Alphaproteobacteria;Rhodospirillales;unclassified Rhodospirillales;Reyranela | 3.881%             | 100%             |
| <i>Endozoicomonas numazuensis</i>        | Bacteria;Proteobacteria;Gammaproteobacteria;Oceanospirillales;Hahellaceae;Endozoicomonas             | 3.637%             | 100%             |
| <i>Arcobacter nitrofigilis</i>           | Bacteria;Proteobacteria;Epsilonproteobacteria;Campylobacterales;Campylobacteraceae;Arcobacter        | 2.665%             | 83%              |
| <i>Caulobacter vibrioides</i>            | Bacteria;Proteobacteria;Alphaproteobacteria;Caulobacterales;Caulobacteraceae;Caulobacter             | 2.657%             | 100%             |
| <i>Pseudoalteromonas phenolica</i>       | Bacteria;Proteobacteria;Gammaproteobacteria;Alteromonadales;Pseudoalteromonadaceae;Pseudoalteromonas | 2.371%             | 67%              |
| <i>Kistimonas asteriae</i>               | Bacteria;Proteobacteria;Gammaproteobacteria;Oceanospirillales;Hahellaceae;Kistimonas                 | 2.292%             | 94%              |
| <i>Psychrosphaera saromensis</i>         | Bacteria;Proteobacteria;Gammaproteobacteria;Alteromonadales;Pseudoalteromonadaceae;Psychrosphaera    | 2.255%             | 83%              |
| <i>Endozoicomonas montiporae</i>         | Bacteria;Proteobacteria;Gammaproteobacteria;Oceanospirillales;Hahellaceae;Endozoicomonas             | 2.125%             | 94%              |
| <i>Vibrio fortis</i>                     | Bacteria;Proteobacteria;Gammaproteobacteria;Vibrionales;Vibrionaceae;Vibrio                          | 1.882%             | 94%              |
| <i>Arcobacter bivalviorum</i>            | Bacteria;Proteobacteria;Epsilonproteobacteria;Campylobacterales;Campylobacteraceae;Arcobacter        | 1.767%             | 72%              |
| <i>Prosthecomicrobium hirschii</i>       | Bacteria;Proteobacteria;Alphaproteobacteria;Rhizobiales;Hyphomicrobiaceae;Prosthecomicrobium         | 1.652%             | 100%             |
| <i>Vibrio parahaemolyticus</i>           | Bacteria;Proteobacteria;Gammaproteobacteria;Vibrionales;Vibrionaceae;Vibrio;Vibrio harveyi group     | 1.597%             | 89%              |
| <i>Bradyrhizobium rifense</i>            | Bacteria;Proteobacteria;Alphaproteobacteria;Rhizobiales;Bradyrhizobiaceae;Bradyrhizobium             | 1.570%             | 100%             |
| <i>Pseudoalteromonas luteoviolacea</i>   | Bacteria;Proteobacteria;Gammaproteobacteria;Alteromonadales;Pseudoalteromonadaceae;Pseudoalteromonas | 1.412%             | 78%              |
| <i>Vibrio hepatarius</i>                 | Bacteria;Proteobacteria;Gammaproteobacteria;Vibrionales;Vibrionaceae;Vibrio;Vibrio oreintalis group  | 1.251%             | 78%              |
| <i>Pseudoalteromonas spongiae</i>        | Bacteria;Proteobacteria;Gammaproteobacteria;Alteromonadales;Pseudoalteromonadaceae;Pseudoalteromonas | 0.946%             | 78%              |
| <i>Vibrio maritimus</i>                  | Bacteria;Proteobacteria;Gammaproteobacteria;Vibrionales;Vibrionaceae;Vibrio                          | 0.586%             | 89%              |
| <i>Parasegetibacter terrae</i>           | Bacteria;Bacteroidetes;Chitinophagia;Chitinophagales;Chitinophagaceae;Parasegetibacter               | 0.586%             | 94%              |
| <i>Vibrio brasiliensis</i>               | Bacteria;Proteobacteria;Gammaproteobacteria;Vibrionales;Vibrionaceae;Vibrio;Vibrio oreintalis group  | 0.553%             | 83%              |
| <i>Nevskia terrae</i>                    | Bacteria;Proteobacteria;Gammaproteobacteria;Nevskiales;Sinobacteraceae;Nevskia                       | 0.507%             | 100%             |

|                                      |                                                                                                      |        |     |
|--------------------------------------|------------------------------------------------------------------------------------------------------|--------|-----|
| <i>Vibrio rotiferianus</i>           | Bacteria;Proteobacteria;Gammaproteobacteria;Vibrionales;Vibrionaceae;Vibrio;Vibrio harveyi group     | 0.443% | 78% |
| <i>Rhizomicrobium palustre</i>       | Bacteria;Proteobacteria;Alphaproteobacteria;Micropepsales;Micropepsaceae;Rhizomicrobium              | 0.434% | 94% |
| <i>Burkholderia fungorum</i>         | Bacteria;Proteobacteria;Betaproteobacteria;Burkholderiales;Burkholderiaceae;Paraburkholderia         | 0.382% | 89% |
| <i>Alteromonas macleodii</i>         | Bacteria;Proteobacteria;Gammaproteobacteria;Alteromonadales;Alteromonadaceae;Alteromonas             | 0.348% | 67% |
| <i>Sediminibacterium goheungense</i> | Bacteria;Bacteroidetes;Chitinophagia;Chitinophagales;Chitinophagaceae;Sediminibacterium              | 0.342% | 94% |
| <i>Steroidobacter agariperforans</i> | Bacteria;Proteobacteria;Gammaproteobacteria;Nevskiales;Sinobacteraceae;Steroidobacter                | 0.334% | 89% |
| <i>Vibrio coralliilyticus</i>        | Bacteria;Proteobacteria;Gammaproteobacteria;Vibrionales;Vibrionaceae;Vibrio                          | 0.319% | 67% |
| <i>Hyphomicrobium facile</i>         | Bacteria;Proteobacteria;Alphaproteobacteria;Rhizobiales;Hyphomicrobiaceae;Hyphomicrobium             | 0.293% | 89% |
| <i>Hydrocarboniphaga effusa</i>      | Bacteria;Proteobacteria;Gammaproteobacteria;Nevskiales;Sinobacteraceae;Hydrocarboniphaga             | 0.292% | 94% |
| <i>Endozoicomonas gorgoniicola</i>   | Bacteria;Proteobacteria;Gammaproteobacteria;Oceanospirillales;Hahellaceae;Endozoicomonas             | 0.259% | 67% |
| <i>Vibrio furnissii</i>              | Bacteria;Proteobacteria;Gammaproteobacteria;Vibrionales;Vibrionaceae;Vibrio                          | 0.242% | 61% |
| <i>Hydrocarboniphaga daqingensis</i> | Bacteria;Proteobacteria;Gammaproteobacteria;Nevskiales;Sinobacteraceae;Hydrocarboniphaga             | 0.239% | 89% |
| <i>Bradyrhizobium oligotrophicum</i> | Bacteria;Proteobacteria;Alphaproteobacteria;Rhizobiales;Bradyrhizobiaceae;Bradyrhizobium             | 0.224% | 83% |
| <i>Fimbriimonas ginsengisoli</i>     | Bacteria;Armatimonadetes;Fimbriimonadia;Fimbriimonadales;Fimbriimonadaceae;Fimbriimonas              | 0.204% | 72% |
| <i>Asinibacterium lactis</i>         | Bacteria;Bacteroidetes;Chitinophagia;Chitinophagales;Chitinophagaceae;Asinibacterium                 | 0.195% | 78% |
| <i>Caulobacter henricii</i>          | Bacteria;Proteobacteria;Alphaproteobacteria;Caulobacterales;Caulobacteraceae;Caulobacter             | 0.192% | 89% |
| <i>Pseudoalteromonas lipolytica</i>  | Bacteria;Proteobacteria;Gammaproteobacteria;Alteromonadales;Pseudoalteromonadaceae;Pseudoalteromonas | 0.190% | 67% |
| <i>Thalassotalea loyana</i>          | Bacteria;Proteobacteria;Gammaproteobacteria;Alteromonadales;Colwelliaceae;Thalassotalea              | 0.145% | 67% |
| <i>Photobacterium rosenbergii</i>    | Bacteria;Proteobacteria;Gammaproteobacteria;Vibrionales;Vibrionaceae;Photobacterium                  | 0.145% | 56% |
| <i>Vibrio agarivorans</i>            | Bacteria;Proteobacteria;Gammaproteobacteria;Vibrionales;Vibrionaceae;Vibrio                          | 0.119% | 61% |
| <i>Methylocystis heyeri</i>          | Bacteria;Proteobacteria;Alphaproteobacteria;Rhizobiales;Methylocystaceae;Methylocystis               | 0.115% | 83% |
| <i>Amphritea balenae</i>             | Bacteria;Proteobacteria;Gammaproteobacteria;Oceanospirillales;Oceanospirillaceae;Amphritea           | 0.108% | 61% |
| <i>Oligotropha carboxidovorans</i>   | Bacteria;Proteobacteria;Alphaproteobacteria;Rhizobiales;Bradyrhizobiaceae;Oligotropha                | 0.099% | 61% |
| <i>Vibrio caribbeanicus</i>          | Bacteria;Proteobacteria;Gammaproteobacteria;Vibrionales;Vibrionaceae;Vibrio                          | 0.089% | 56% |
| <i>Endobacter medicaginis</i>        | Bacteria;Proteobacteria;Alphaproteobacteria;Rhodospirillales;Acetobacteraceae;Endobacter             | 0.084% | 78% |
| <i>Vibrio ponticus</i>               | Bacteria;Proteobacteria;Gammaproteobacteria;Vibrionales;Vibrionaceae;Vibrio                          | 0.081% | 50% |
| <i>Vibrio neptunius</i>              | Bacteria;Proteobacteria;Gammaproteobacteria;Vibrionales;Vibrionaceae;Vibrio                          | 0.080% | 67% |
| <i>Rhizomicrobium electricum</i>     | Bacteria;Proteobacteria;Alphaproteobacteria;Micropepsales;Micropepsaceae;Rhizomicrobium              | 0.080% | 89% |
| <i>Endozoicomonas atrinae</i>        | Bacteria;Proteobacteria;Gammaproteobacteria;Oceanospirillales;Hahellaceae;Endozoicomonas             | 0.073% | 72% |
| <i>Alteromonas mediterranea</i>      | Bacteria;Proteobacteria;Gammaproteobacteria;Alteromonadales;Alteromonadaceae;Alteromonas             | 0.069% | 61% |

|                                       |                                                                                                      |        |     |
|---------------------------------------|------------------------------------------------------------------------------------------------------|--------|-----|
| <i>Vibrio harveyi</i>                 | Bacteria;Proteobacteria;Gammaproteobacteria;Vibrionales;Vibrionaceae;Vibrio;Vibrio harveyi group     | 0.066% | 56% |
| <i>Vibrio pelagius</i>                | Bacteria;Proteobacteria;Gammaproteobacteria;Vibrionales;Vibrionaceae;Vibrio                          | 0.060% | 56% |
| <i>Salinirepens amamiensis</i>        | Bacteria;Bacteroidetes;Flavobacteriia;Flavobacteriales;Crocinitomicaceae;Salinirepens                | 0.050% | 67% |
| <i>Prochlorococcus marinus</i>        | Bacteria;Cyanobacteria;Synechococcales;Prochloraceae;Prochlorococcus                                 | 0.044% | 61% |
| <i>Tropicibacter phthalicus</i>       | Bacteria;Proteobacteria;Alphaproteobacteria;Rhodobacterales;Rhodobacteraceae;Tropicibacter           | 0.042% | 72% |
| <i>Pseudoalteromonas rubra</i>        | Bacteria;Proteobacteria;Gammaproteobacteria;Alteromonadales;Pseudoalteromonadaceae;Pseudoalteromonas | 0.042% | 50% |
| <i>Telmatospirillum siberiense</i>    | Bacteria;Proteobacteria;Alphaproteobacteria;Rhodospirillales;Rhodospirillaceae;Telmatospirillum      | 0.040% | 61% |
| <i>Reyranela soli</i>                 | Bacteria;Proteobacteria;Alphaproteobacteria;Rhodospirillales;unclassified Rhodospirillales;Reyranela | 0.038% | 72% |
| <i>Pseudoalteromonas flavipulchra</i> | Bacteria;Proteobacteria;Gammaproteobacteria;Alteromonadales;Pseudoalteromonadaceae;Pseudoalteromonas | 0.038% | 61% |
| <i>Thalassotalea ganghwensis</i>      | Bacteria;Proteobacteria;Gammaproteobacteria;Alteromonadales;Colwelliaceae;Thalassotalea              | 0.036% | 50% |
| <i>Pseudoalteromonas agarivorans</i>  | Bacteria;Proteobacteria;Gammaproteobacteria;Alteromonadales;Pseudoalteromonadaceae;Pseudoalteromonas | 0.034% | 61% |
| <i>Pseudoalteromonas tetradonis</i>   | Bacteria;Proteobacteria;Gammaproteobacteria;Alteromonadales;Pseudoalteromonadaceae;Pseudoalteromonas | 0.033% | 67% |
| <i>Vibrio mediterranei</i>            | Bacteria;Proteobacteria;Gammaproteobacteria;Vibrionales;Vibrionaceae;Vibrio                          | 0.032% | 50% |
| <i>Bradyrhizobium pachyrhizi</i>      | Bacteria;Proteobacteria;Alphaproteobacteria;Rhizobiales;Bradyrhizobiaceae;Bradyrhizobium             | 0.031% | 50% |
| <i>Pseudoalteromonas arabiensis</i>   | Bacteria;Proteobacteria;Gammaproteobacteria;Alteromonadales;Pseudoalteromonadaceae;Pseudoalteromonas | 0.029% | 50% |
| <i>Povalibacter uvarum</i>            | Bacteria;Proteobacteria;Gammaproteobacteria;Nevskiales;Sinobacteraceae;Povalibacter                  | 0.027% | 50% |
| <i>Aquibacter zeaxanthinifaciens</i>  | Bacteria;Bacteroidetes;Flavobacteriia;Flavobacteriales;Flavobacteriaceae;Aquibacter                  | 0.026% | 50% |
| <i>Alteromonas mediterranea</i>       | Bacteria;Proteobacteria;Gammaproteobacteria;Alteromonadales;Alteromonadaceae;Alteromonas             | 0.026% | 50% |
| <i>Vibrio natriegens</i>              | Bacteria;Proteobacteria;Gammaproteobacteria;Vibrionales;Vibrionaceae;Vibrio;Vibrio harveyi group     | 0.026% | 50% |
| <i>Vibrio alginolyticus</i>           | Bacteria;Proteobacteria;Gammaproteobacteria;Vibrionales;Vibrionaceae;Vibrio;Vibrio harveyi group     | 0.021% | 56% |
| <i>Vibrio inhibens</i>                | Bacteria;Proteobacteria;Gammaproteobacteria;Vibrionales;Vibrionaceae;Vibrio                          | 0.021% | 50% |
| <i>Pseudoalteromonas aurantia</i>     | Bacteria;Proteobacteria;Gammaproteobacteria;Alteromonadales;Pseudoalteromonadaceae;Pseudoalteromonas | 0.020% | 56% |
| <i>Acidisphaera rubrifaciens</i>      | Bacteria;Proteobacteria;Alphaproteobacteria;Rhodospirillales;Acetobacteraceae;Acidisphaera           | 0.020% | 56% |
| <i>Pseudoalteromonas antarctica</i>   | Bacteria;Proteobacteria;Gammaproteobacteria;Alteromonadales;Pseudoalteromonadaceae;Pseudoalteromonas | 0.019% | 50% |
| <i>Vibrio tubiashii</i>               | Bacteria;Proteobacteria;Gammaproteobacteria;Vibrionales;Vibrionaceae;Vibrio;Vibrio oreintalis group  | 0.019% | 50% |
| <i>Pseudoalteromonas aliena</i>       | Bacteria;Proteobacteria;Gammaproteobacteria;Alteromonadales;Pseudoalteromonadaceae;Pseudoalteromonas | 0.017% | 56% |
| <i>Caulobacter mirabilis</i>          | Bacteria;Proteobacteria;Alphaproteobacteria;Caulobacterales;Caulobacteraceae;Caulobacter             | 0.017% | 61% |
| <i>Pseudoalteromonas translucida</i>  | Bacteria;Proteobacteria;Gammaproteobacteria;Alteromonadales;Pseudoalteromonadaceae;Pseudoalteromonas | 0.015% | 61% |
| <i>Nisaea nitritireducens</i>         | Bacteria;Proteobacteria;Alphaproteobacteria;Rhodospirillales;Rhodospirillaceae;Nisaea                | 0.015% | 61% |
| <i>Ichthyenterobacterium magnum</i>   | Bacteria;Bacteroidetes;Flavobacteriia;Flavobacteriales;Flavobacteriaceae;Ichthyenterobacterium       | 0.014% | 50% |

**Supplementary Table S3.** Performance of full-length 16S, V3-V4 or V5-V6 regions in identifying *P. lutea*-associated bacteria at the species level.

| Genus found in <i>P. lutea</i> samples | Number of species in the genus | Number (and %) of classifiable species using full-length sequences |        | Number (and %) of classifiable species using V3-V4 sequences |        | Number (and %) of classifiable species using V5-V6 sequences |        |
|----------------------------------------|--------------------------------|--------------------------------------------------------------------|--------|--------------------------------------------------------------|--------|--------------------------------------------------------------|--------|
|                                        |                                |                                                                    |        |                                                              |        |                                                              |        |
| <i>Acinetobacter</i>                   | 38                             | 38                                                                 | 100.0% | 37                                                           | 97.4%  | 19                                                           | 50.0%  |
| <i>Afipia</i>                          | 5                              | 5                                                                  | 100.0% | 5                                                            | 100.0% | 5                                                            | 100.0% |
| <i>Agarivorans</i>                     | 3                              | 3                                                                  | 100.0% | 3                                                            | 100.0% | 2                                                            | 66.7%  |
| <i>Agrococcus</i>                      | 9                              | 9                                                                  | 100.0% | 6                                                            | 66.7%  | 8                                                            | 88.9%  |
| <i>Alcanivorax</i>                     | 9                              | 9                                                                  | 100.0% | 8                                                            | 88.9%  | 8                                                            | 88.9%  |
| <i>Alteromonas</i>                     | 13                             | 13                                                                 | 100.0% | 8                                                            | 61.5%  | 12                                                           | 92.3%  |
| <i>Amphritea</i>                       | 4                              | 4                                                                  | 100.0% | 4                                                            | 100.0% | 4                                                            | 100.0% |
| <i>Arcobacter</i>                      | 17                             | 17                                                                 | 100.0% | 16                                                           | 94.1%  | 16                                                           | 94.1%  |
| <i>Asticcacaulis</i>                   | 6                              | 6                                                                  | 100.0% | 6                                                            | 100.0% | 6                                                            | 100.0% |
| <i>Bacillus</i>                        | 198                            | 197                                                                | 99.5%  | 175                                                          | 88.4%  | 150                                                          | 75.8%  |
| <i>Bacteriovorax</i>                   | 1                              | 1                                                                  | 100.0% | 1                                                            | 100.0% | 1                                                            | 100.0% |
| <i>Balneola</i>                        | 2                              | 2                                                                  | 100.0% | 2                                                            | 100.0% | 2                                                            | 100.0% |
| <i>Bradyrhizobium</i>                  | 23                             | 22                                                                 | 95.7%  | 6                                                            | 26.1%  | 10                                                           | 43.5%  |
| <i>Burkholderia</i>                    | 85                             | 85                                                                 | 100.0% | 82                                                           | 96.5%  | 63                                                           | 74.1%  |
| <i>Clostridium</i>                     | 164                            | 164                                                                | 100.0% | 156                                                          | 95.1%  | 145                                                          | 88.4%  |
| <i>Cohaesibacter</i>                   | 3                              | 3                                                                  | 100.0% | 3                                                            | 100.0% | 3                                                            | 100.0% |
| <i>Congregibacter</i>                  | 1                              | 1                                                                  | 100.0% | 1                                                            | 100.0% | 1                                                            | 100.0% |
| <i>Coraliomargarita</i>                | 2                              | 2                                                                  | 100.0% | 1                                                            | 50.0%  | 1                                                            | 50.0%  |
| <i>Desulfobacter</i>                   | 6                              | 6                                                                  | 100.0% | 6                                                            | 100.0% | 6                                                            | 100.0% |
| <i>Desulfococcus</i>                   | 2                              | 2                                                                  | 100.0% | 2                                                            | 100.0% | 2                                                            | 100.0% |
| <i>Devosia</i>                         | 16                             | 16                                                                 | 100.0% | 14                                                           | 87.5%  | 16                                                           | 100.0% |
| <i>Enhydrobacter</i>                   | 1                              | 1                                                                  | 100.0% | 1                                                            | 100.0% | 1                                                            | 100.0% |
| <i>Enterovibrio</i>                    | 4                              | 4                                                                  | 100.0% | 4                                                            | 100.0% | 4                                                            | 100.0% |
| <i>Ferrimonas</i>                      | 7                              | 7                                                                  | 100.0% | 7                                                            | 100.0% | 7                                                            | 100.0% |

|                          |     |     |        |     |        |    |        |
|--------------------------|-----|-----|--------|-----|--------|----|--------|
| <i>Fimbriimonas</i>      | 1   | 1   | 100.0% | 1   | 100.0% | 1  | 100.0% |
| <i>Flammeovirga</i>      | 5   | 5   | 100.0% | 5   | 100.0% | 5  | 100.0% |
| <i>Flavobacterium</i>    | 121 | 121 | 100.0% | 115 | 95.0%  | 97 | 80.2%  |
| <i>Fluviicola</i>        | 2   | 2   | 100.0% | 2   | 100.0% | 2  | 100.0% |
| <i>Francisella</i>       | 7   | 7   | 100.0% | 7   | 100.0% | 5  | 71.4%  |
| <i>Fulvivirga</i>        | 2   | 2   | 100.0% | 2   | 100.0% | 2  | 100.0% |
| <i>Fusibacter</i>        | 3   | 3   | 100.0% | 3   | 100.0% | 3  | 100.0% |
| <i>Gemmata</i>           | 1   | 1   | 100.0% | 1   | 100.0% | 1  | 100.0% |
| <i>Glaciecola</i>        | 3   | 3   | 100.0% | 3   | 100.0% | 3  | 100.0% |
| <i>Hymenobacter</i>      | 33  | 33  | 100.0% | 33  | 100.0% | 28 | 84.8%  |
| <i>Hyphomicrobium</i>    | 9   | 9   | 100.0% | 8   | 88.9%  | 9  | 100.0% |
| <i>Idiomarina</i>        | 23  | 23  | 100.0% | 23  | 100.0% | 19 | 82.6%  |
| <i>Janthinobacterium</i> | 2   | 2   | 100.0% | 2   | 100.0% | 2  | 100.0% |
| <i>Lentisphaera</i>      | 2   | 2   | 100.0% | 1   | 50.0%  | 2  | 100.0% |
| <i>Luteimonas</i>        | 11  | 11  | 100.0% | 11  | 100.0% | 11 | 100.0% |
| <i>Lysobacter</i>        | 28  | 28  | 100.0% | 28  | 100.0% | 26 | 92.9%  |
| <i>Magnetospirillum</i>  | 2   | 2   | 100.0% | 2   | 100.0% | 2  | 100.0% |
| <i>Marinomonas</i>       | 24  | 24  | 100.0% | 24  | 100.0% | 18 | 75.0%  |
| <i>Methylobacterium</i>  | 48  | 48  | 100.0% | 33  | 68.8%  | 45 | 93.8%  |
| <i>Methyloversatilis</i> | 2   | 2   | 100.0% | 2   | 100.0% | 2  | 100.0% |
| <i>Nautella</i>          | 1   | 1   | 100.0% | 1   | 100.0% | 1  | 100.0% |
| <i>Neptunomonas</i>      | 7   | 7   | 100.0% | 7   | 100.0% | 7  | 100.0% |
| <i>Nevskia</i>           | 5   | 5   | 100.0% | 5   | 100.0% | 5  | 100.0% |
| <i>Oceanospirillum</i>   | 4   | 4   | 100.0% | 4   | 100.0% | 4  | 100.0% |
| <i>Oleibacter</i>        | 1   | 1   | 100.0% | 1   | 100.0% | 1  | 100.0% |
| <i>Oleispira</i>         | 2   | 2   | 100.0% | 2   | 100.0% | 2  | 100.0% |
| <i>Pedomicrobium</i>     | 4   | 4   | 100.0% | 4   | 100.0% | 2  | 50.0%  |
| <i>Persicobacter</i>     | 2   | 2   | 100.0% | 2   | 100.0% | 2  | 100.0% |
| <i>Phaeobacter</i>       | 2   | 2   | 100.0% | 2   | 100.0% | 2  | 100.0% |
| <i>Photobacterium</i>    | 24  | 24  | 100.0% | 24  | 100.0% | 21 | 87.5%  |



|                          |     |     |        |     |        |    |        |
|--------------------------|-----|-----|--------|-----|--------|----|--------|
| <i>Prochlorococcus</i>   | 1   | 1   | 100.0% | 1   | 100.0% | 1  | 100.0% |
| <i>Propionibacterium</i> | 14  | 14  | 100.0% | 9   | 64.3%  | 14 | 100.0% |
| <i>Propionigenium</i>    | 2   | 2   | 100.0% | 2   | 100.0% | 2  | 100.0% |
| <i>Pseudoalteromonas</i> | 39  | 39  | 100.0% | 27  | 69.2%  | 31 | 79.5%  |
| <i>Pseudomonas</i>       | 157 | 156 | 99.4%  | 130 | 82.8%  | 85 | 54.1%  |
| <i>Pseudoruegeria</i>    | 4   | 4   | 100.0% | 4   | 100.0% | 4  | 100.0% |
| <i>Psychrobacter</i>     | 34  | 34  | 100.0% | 29  | 85.3%  | 10 | 29.4%  |
| <i>Reinekea</i>          | 3   | 3   | 100.0% | 3   | 100.0% | 3  | 100.0% |
| <i>Rhodoplanes</i>       | 6   | 6   | 100.0% | 5   | 83.3%  | 6  | 100.0% |
| <i>Roseivirga</i>        | 3   | 3   | 100.0% | 3   | 100.0% | 3  | 100.0% |
| <i>Salinisphaera</i>     | 6   | 6   | 100.0% | 5   | 83.3%  | 5  | 83.3%  |
| <i>Saprospira</i>        | 2   | 2   | 100.0% | 2   | 100.0% | 2  | 100.0% |
| <i>Sediminibacterium</i> | 3   | 3   | 100.0% | 3   | 100.0% | 2  | 66.7%  |
| <i>Shewanella</i>        | 61  | 60  | 98.4%  | 54  | 88.5%  | 42 | 68.9%  |
| <i>Sphingobium</i>       | 34  | 34  | 100.0% | 28  | 82.4%  | 31 | 91.2%  |
| <i>Sphingomonas</i>      | 70  | 70  | 100.0% | 57  | 81.4%  | 62 | 88.6%  |
| <i>Spirochaeta</i>       | 16  | 16  | 100.0% | 16  | 100.0% | 15 | 93.8%  |
| <i>Spongiibacter</i>     | 2   | 2   | 100.0% | 2   | 100.0% | 2  | 100.0% |
| <i>Staphylococcus</i>    | 47  | 47  | 100.0% | 38  | 80.9%  | 26 | 55.3%  |
| <i>Stenotrophomonas</i>  | 11  | 11  | 100.0% | 11  | 100.0% | 8  | 72.7%  |
| <i>Telmatospirillum</i>  | 1   | 1   | 100.0% | 1   | 100.0% | 1  | 100.0% |
| <i>Tenacibaculum</i>     | 20  | 20  | 100.0% | 19  | 95.0%  | 20 | 100.0% |
| <i>Tepidibacter</i>      | 3   | 3   | 100.0% | 3   | 100.0% | 3  | 100.0% |
| <i>Thalassobius</i>      | 4   | 4   | 100.0% | 4   | 100.0% | 4  | 100.0% |
| <i>Thalassococcus</i>    | 2   | 2   | 100.0% | 2   | 100.0% | 2  | 100.0% |
| <i>Thalassomonas</i>     | 4   | 4   | 100.0% | 4   | 100.0% | 4  | 100.0% |
| <i>Thalassospira</i>     | 8   | 8   | 100.0% | 7   | 87.5%  | 5  | 62.5%  |
| <i>Vibrio</i>            | 100 | 100 | 100.0% | 93  | 93.0%  | 55 | 55.0%  |

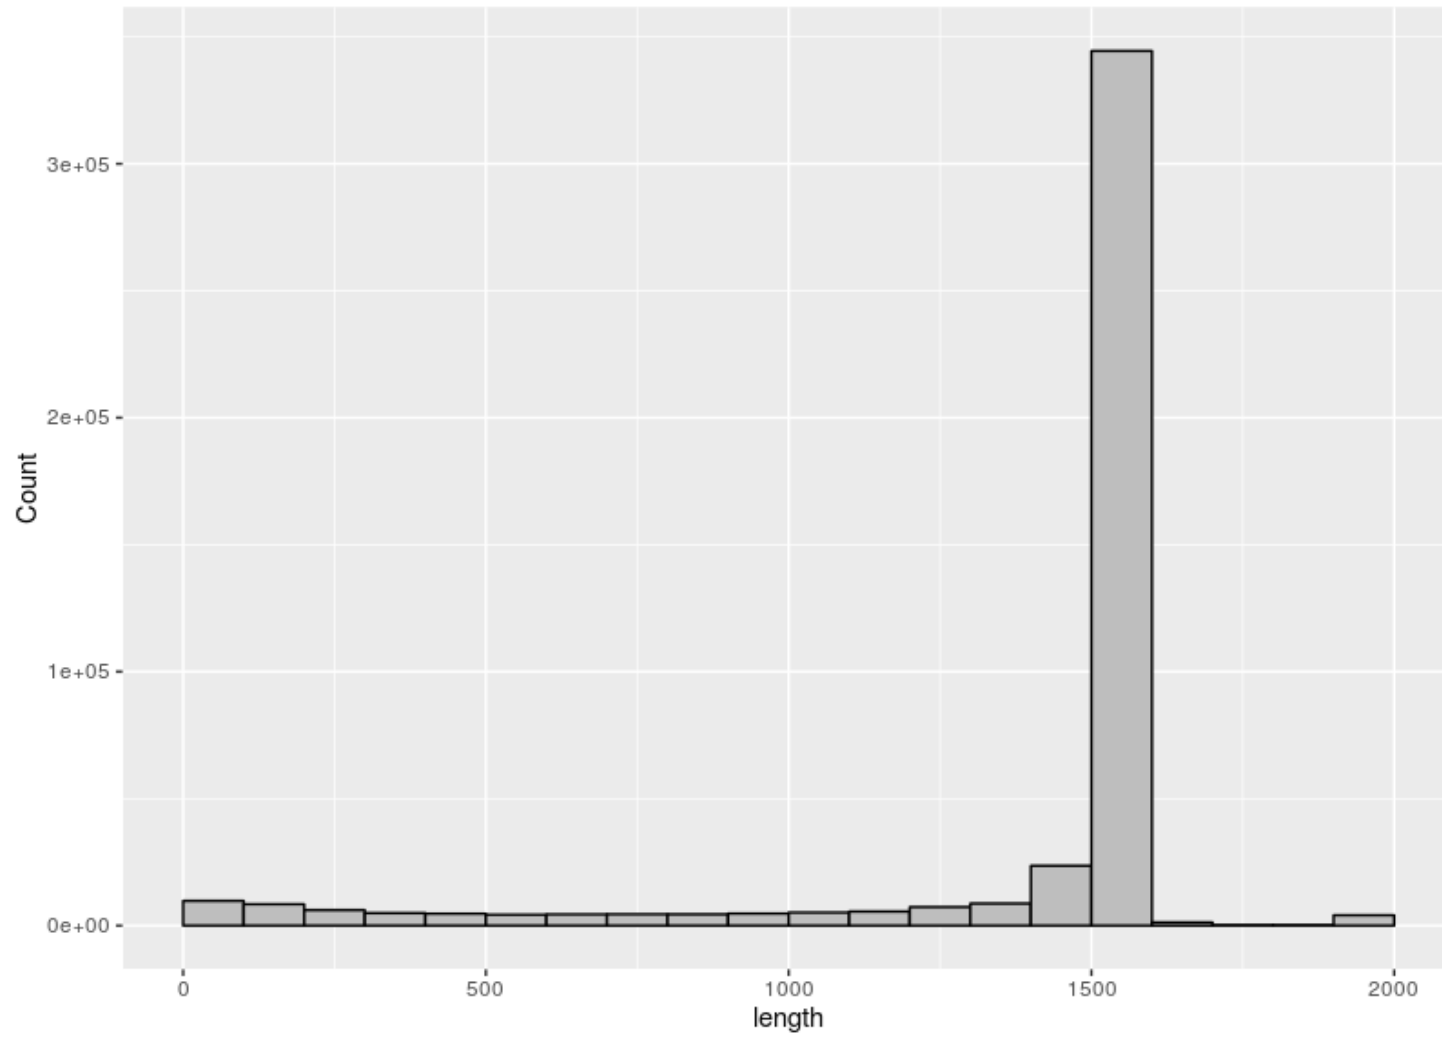

**Supplementary Figure S1:** Length distribution of PacBio CCS reads.

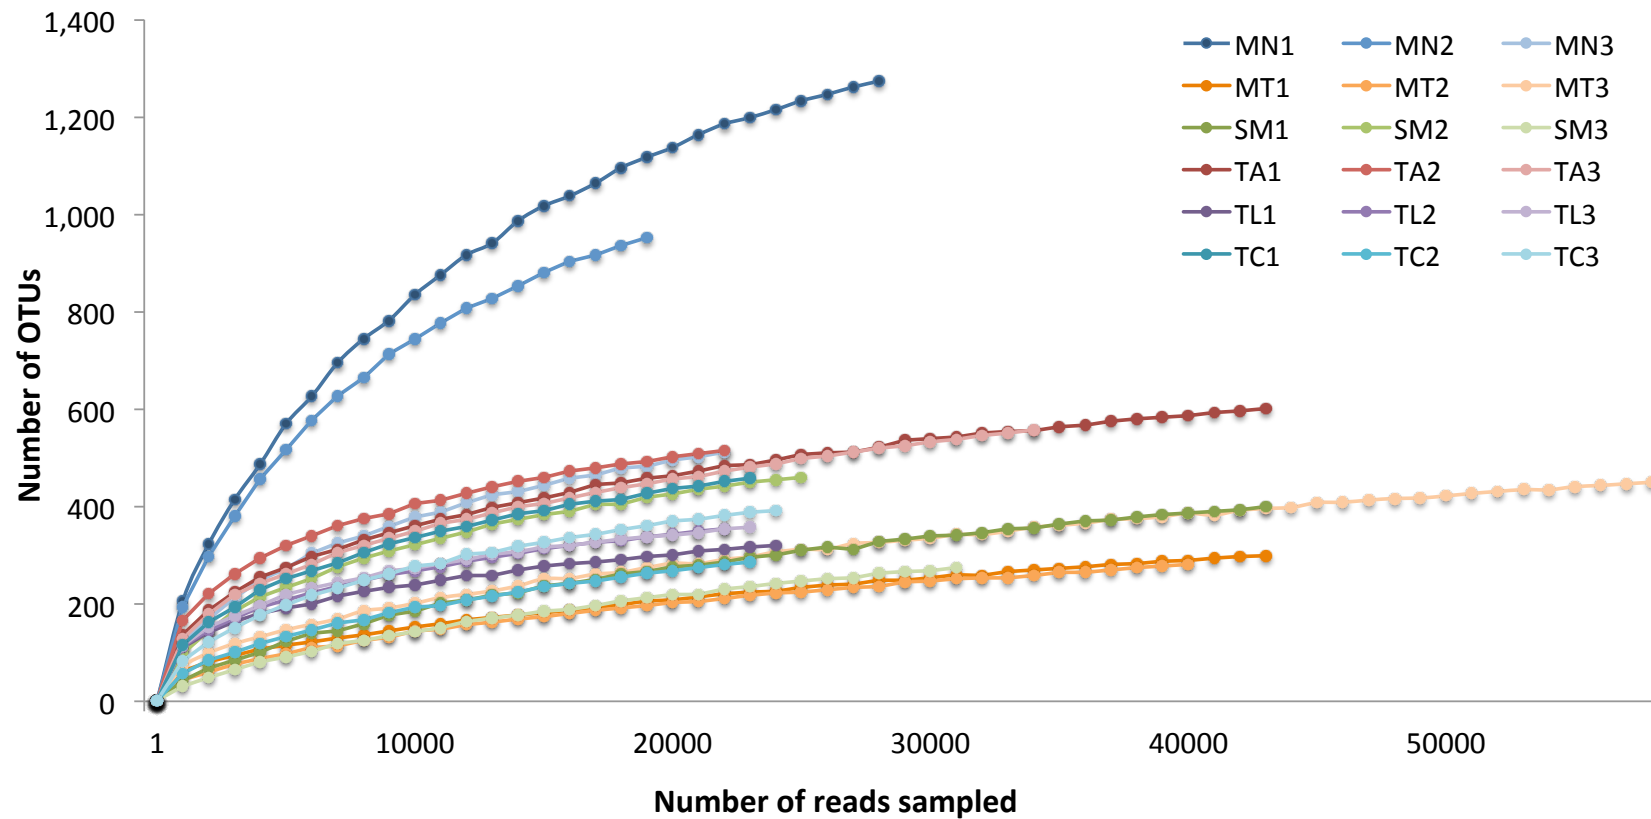

**Supplementary Figure S2:** Rarefaction curves of OTUs for the coral-associated bacterial community samples from the Gulf of Thailand and Andaman Sea.

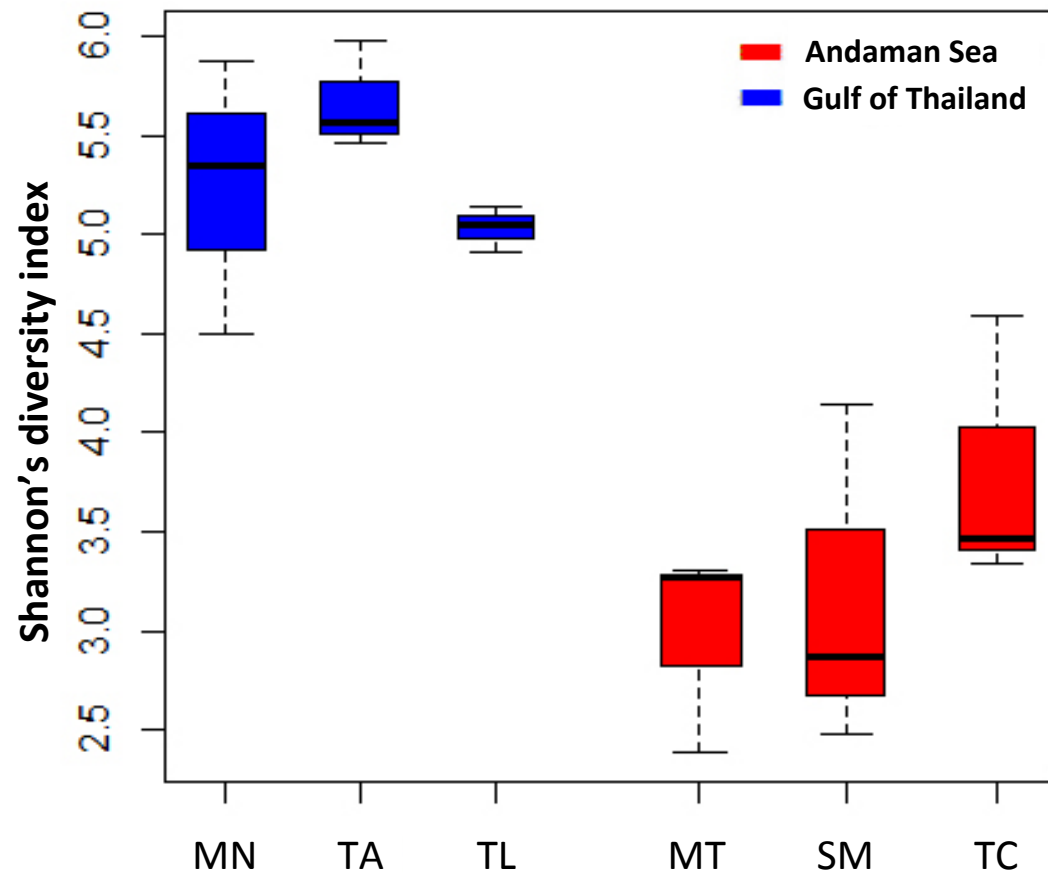

**Supplementary Figure S3:** Box-plots showing the Shannon diversity indices of coral-associated bacteria from six sampling sites.

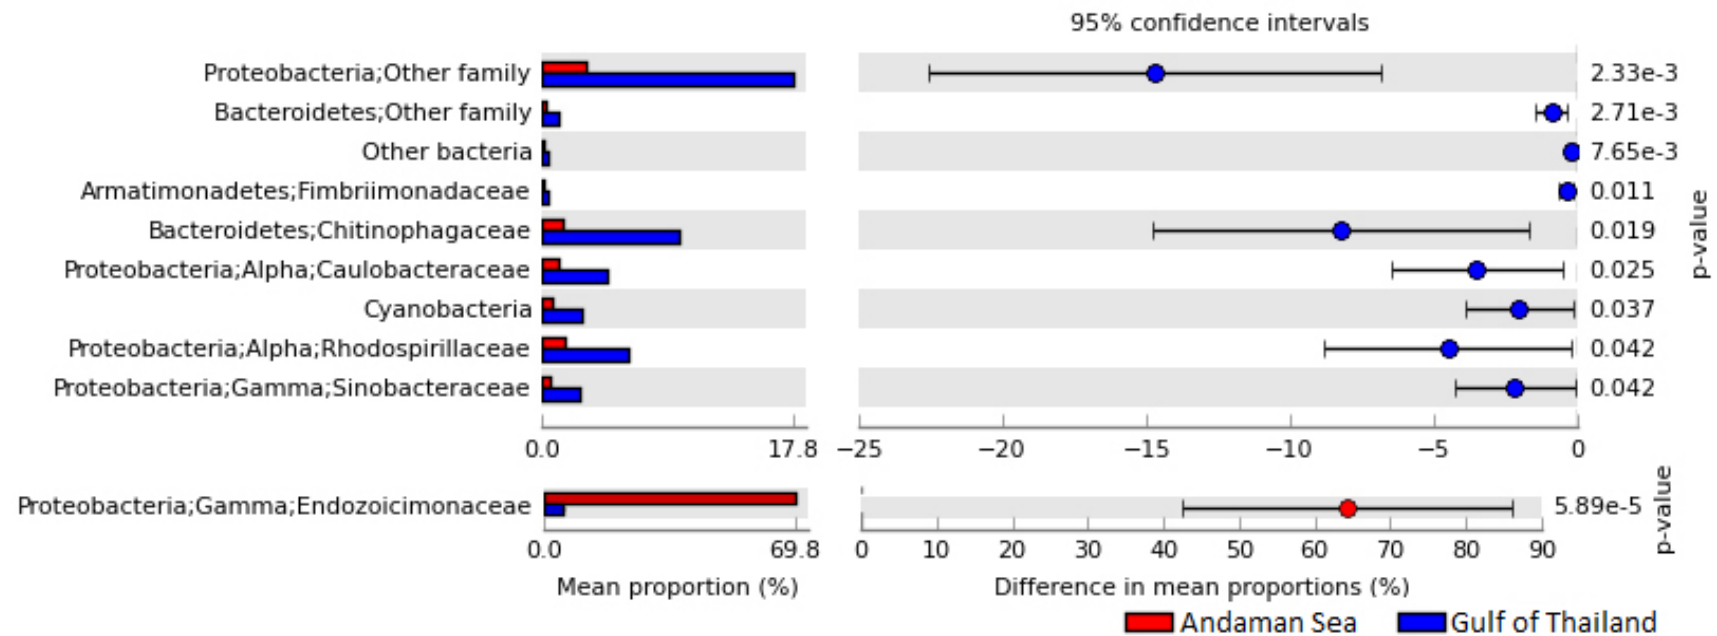

**Supplemental Figure S4.** Welch's *t*-test based comparative analysis of family abundance in bacterial communities from the Gulf of Thailand and Andaman Sea ( $P < 0.05$ ).

Supplementary Figure S5. Examples of sequence alignment of 16S rRNA genes from closely related bacterial species demonstrating the cases where V3-V4 or V5-V6 regions alone cannot be used for species identification.

V3-V4 was highlighted in green

V5-V6 was highlighted in blue

=====  
CLUSTAL W (1.81) multiple sequence alignment

```
Alteromonas_mediterranea_S004067      TTAGTTCAGAGTTTGATCATGGCTCAGATTGAACGCTGGCGGCAGGCCTAACACATGCAA
Alteromonas_macleodii_S000014590      -----CTCAGATTGAACGCTGGCGGCAGGCCTAACACATGCAA
Alteromonas_gracilis_S004263718       -----TGGCTCAGATTGAACGCTGGCGGCAGGCCTAACACATGCAA
                                         *****

Alteromonas_mediterranea_S004067      GTCGAACGGTAACAGGATTAGCTTGCTAATCGCTGACGAGTGGCGGACGGGTGAGTAATG
Alteromonas_macleodii_S000014590      GTCGAACGGTAACATTTCTAGCTTGCTAGAAGATGACGAGTGGCGGACGGGTGAGTAATG
Alteromonas_gracilis_S004263718       GTCGAACGGTAACATTTCTAGCTTGCTAGAAGATGACGAGTGGCGGACGGGTGAGTAATG
                                         *****      * *****

Alteromonas_mediterranea_S004067      CTTGGGAAGTTGCCCTTGCGAGGGGGATAACAGTTGAAAACGACTGCTAATACCGCATAA
Alteromonas_macleodii_S000014590      CTTGGGAAGTTGCCCTTGCGAGGGGGATAACAGTTGAAAACGACTGCTAATACCGCATAA
Alteromonas_gracilis_S004263718       CTTGGGAAGTTGCCCTTGCGAGGGGGATAACAGTTGAAAACGACTGCTAATACCGCATAA
                                         *****

Alteromonas_mediterranea_S004067      CGTCTACGGACCAAACGGGGCTTAGGCTCCGGCGCAAAGAGAGGCCCAAGTGAGATTAGC
Alteromonas_macleodii_S000014590      TGTCTTCGGACCAAACGGGGCTTCGGCTCCGGCGCAAAGAGAGGCCCAAGTGAGATTAGC
Alteromonas_gracilis_S004263718       TGTCTTCGGACCAAACGGGGCTTCGGCTCCGGCGCAAAGAGAGGCCCAAGTGAGATTAGC
                                         **** *****

Alteromonas_mediterranea_S004067      TAGTTGGTAAGGTAAGGCTTACCAAGGCAACGATCTCTAGCTGTTCTGAGAGGAAGATC
Alteromonas_macleodii_S000014590      TAGTTGGTAAGGTAACGGCTTACCAAGGCGACGATCTCTAGCTGTTCTGAGAGGAAGATC
Alteromonas_gracilis_S004263718       TAGTTGGTAAGGTAACGGCTTACCAAGGCGACGATCTCTAGCTGTTCTGAGAGGAAGATC
                                         *****

Alteromonas_mediterranea_S004067      AGCCCACTGGAAGTGAACGACACGGTCCAGACTCCTACGGGAGGCAGCAGTGGGGAATATT
Alteromonas_macleodii_S000014590      AGCCCACTGGGACTGAGACACGGCCAGACTCCTACGGGAGGCAGCAGTGGGGAATATT
Alteromonas_gracilis_S004263718       AGCCCACTGGGACTGAGACACGGCCAGACTCCTACGGGAGGCAGCAGTGGGGAATATT
                                         *****

Alteromonas_mediterranea_S004067      GCACAATGGGGGAAACCCTGATGCAGCCATGCCGCGTGTGTGAAGAAGGCCTTCGGGTTG
Alteromonas_macleodii_S000014590      GCACAATGGGGGAAACCCTGATGCAGCCATGCCGCGTGTGTGAAGAAGGCCTTCGGGTTG
Alteromonas_gracilis_S004263718       GCACAATGGGGGAAACCCTGATGCAGCCATGCCGCGTGTGTGAAGAAGGCCTTCGGGTTG
                                         *****
```

Alteromonas\_mediterranea\_S004067  
Alteromonas\_macleodii\_S000014590  
Alteromonas\_gracilis\_S004263718

TAAAGCACTTTCAGTTGTGAGGAAAAGTTAGTAGTTAATACCTGCTAGCCGTGACGTTAA  
TAAAGCACTTTCAGTTGTGAGGAAAAGTTAGTAGTTAATACCTGCTAGCCGTGACGTTAA  
TAAAGCACTTTCAGTTGTGAGGAAAAGTTAGTAGTTAATACCTGCTAGCCGTGACGTTAA  
\*\*\*\*\*

Alteromonas\_mediterranea\_S004067  
Alteromonas\_macleodii\_S000014590  
Alteromonas\_gracilis\_S004263718

CAACAGAAGAAGCACCCGGCTAACTCCGTGCCAGCAGCCCGGTAATACGGAGGGTGCGAG  
CAACAGAAGAAGCACCCGGCTAACTCCGTGCCAGCAGCCCGGTAATACGGAGGGTGCGAG  
CAACAGAAGAAGCACCCGGCTAACTCCGTGCCAGCAGCCCGGTAATACGGAGGGTGCGAG  
\*\*\*\*\*

Alteromonas\_mediterranea\_S004067  
Alteromonas\_macleodii\_S000014590  
Alteromonas\_gracilis\_S004263718

CGTTAATCGGAATTACTGGGCGTAAAGCGCACGCAGGCGGTTTGTAAAGCTAGATGTGAA  
CGTTAATCGGAATTACTGGGCGTAAAGCGCACGCAGGCGGTTTGTAAAGCTAGATGTGAA  
CGTTAATCGGAATTACTGGGCGTAAAGCGCACGCAGGCGGTTTGTAAAGCTAGATGTGAA  
\*\*\*\*\*

Alteromonas\_mediterranea\_S004067  
Alteromonas\_macleodii\_S000014590  
Alteromonas\_gracilis\_S004263718

AGCCCCGGGCTCAACCTGGGATGGTCATTTAGAACTGGCAGACTAGAGTCTTGGAGAGGG  
AGCCCCGGGCTCAACCTGGGATGGTCATTTAGAACTGGCAGACTAGAGTCTTGGAGAGGG  
AGCCCCGGGCTCAACCTGGGATGGTCATTTAGAACTGGCAGACTAGAGTCTTGGAGAGGG  
\*\*\*\*\*

Alteromonas\_mediterranea\_S004067  
Alteromonas\_macleodii\_S000014590  
Alteromonas\_gracilis\_S004263718

GAGTGGAAATTCAGGTGTAGCGGTGAAATGCGTAGATATCTGGAGGAACATCAGTGGCGA  
GAGTGGAAATTCAGGTGTAGCGGTGAAATGCGTAGATATCTGGAGGAACATCAGTGGCGA  
GAGTGGAAATTCAGGTGTAGCGGTGAAATGCGTAGATATCTGGAGGAACATCAGTGGCGA  
\*\*\*\*\*

Alteromonas\_mediterranea\_S004067  
Alteromonas\_macleodii\_S000014590  
Alteromonas\_gracilis\_S004263718

AGGCGACTCCCTGGCCAAAGACTGACGCTCATGTGCGAAAGTGTGGGTAGCGAACAGGAT  
AGGCGACTCCCTGGCCAAAGACTGACGCTCATGTGCGAAAGTGTGGGTAGCGAACAGGAT  
AGGCGACTCCCTGGCCAAAGACTGACGCTCATGTGCGAAAGTGTGGGTAGCGAACAGGAT  
\*\*\*\*\*

Alteromonas\_mediterranea\_S004067  
Alteromonas\_macleodii\_S000014590  
Alteromonas\_gracilis\_S004263718

TAGATACCCTGGTAGTCCACACCGTAAACGCTGTCTACTAGCTGTTG-TGACTTTAAGT  
TAGATACCCTGGTAGTCCACACCGTAAACGCTGTCTACTAGCTGTGTGTGTCTCTAAGA  
TAGATACCCTGGTAGTCCACACCGTAAACGCTGTCTACTAGCTGTGTG-TGCCTTTAAGG  
\*\*\*\*\*

Alteromonas\_mediterranea\_S004067  
Alteromonas\_macleodii\_S000014590  
Alteromonas\_gracilis\_S004263718

CGTGAGTAGCGAAGCTAACGCGATAAGTAGACCGCCTGGGGAGTACGGCCGCAAGGTTAA  
CGTGCGTAGCGAAGCTAACGCGATAAGTAGACCGCCTGGGGAGTACGGCCGCAAGGTTAA  
CGTGCGTAGCGAAGCTAACGCGATAAGTAGACCGCCTGGGGAGTACGGCCGCAAGGTTAA  
\*\*\*\*

Alteromonas\_mediterranea\_S004067  
Alteromonas\_macleodii\_S000014590  
Alteromonas\_gracilis\_S004263718

AAC TCAAATGAATTGACGGGGGCCGCACAAGCGGTGGAGCATGTGGTTAATTCGATGC  
AAC TCAAATGAATTGACGGGGGCCGCACAAGCGGTGGAGCATGTGGTTAATTCGATGC  
AAC TCAAATGAATTGACGGGGGCCGCACAAGCGGTGGAGCATGTGGTTAATTCGATGC  
\*\*\*\*\*

Alteromonas\_mediterranea\_S004067  
Alteromonas\_macleodii\_S000014590  
Alteromonas\_gracilis\_S004263718

AACGCGAAGAACCTTACCTACACTTGACATGCAGAGAACCTTCCAGAGATGGATTGGTGC  
AACGCGAAGAACCTTACCTACACTTGACATGCAGAGAACCTTCCAGAGATGGATTGGTGC  
AACGCGAAGAACCTTACCTACACTTGACATGCAGAGAACCTTCCAGAGATGGATTGGTGC  
\*\*\*\*\* \* \*\*\*\*\* \* \*\* \*\*\*\*\*

Alteromonas\_mediterranea\_S004067  
Alteromonas\_macleodii\_S000014590  
Alteromonas\_gracilis\_S004263718

CTTCGGGAACCTCTGACACAGGTGCTGCATGGCTGT CGTCAGCTCGTGTCTGTGAGATGTTG  
CTTCGGGAACCTCTGACACAGGTGCTGCATGGCTGT CGTCAGCTCGTGTCTGTGAGATGTTG  
CTTCGGGAACCTCTGACACAGGTGCTGCATGGCTGT CGTCAGCTCGTGTCTGTGAGATGTTG  
\*\*\*\*\*

Alteromonas\_mediterranea\_S004067  
Alteromonas\_macleodii\_S000014590  
Alteromonas\_gracilis\_S004263718

GGTTAAGTCCCGCAACGAGCGCAACCCTTGTCTTAGTTGCCAGCCTTAAGTTGGGCACT  
GGTTAAGTCCCGCAACGAGCGCAACCCTTGTCTTAGTTGCCAGCCTTAAGTTGGGCACT  
GGTTAAGTCCCGCAACGAGCGCAACCCTTGTCTTAGTTGCCAGCCTTAAGTTGGGCACT  
\*\*\*\*\* \*\* \*\*\*\*\*

Alteromonas\_mediterranea\_S004067  
Alteromonas\_macleodii\_S000014590  
Alteromonas\_gracilis\_S004263718

CTAAGGAGACTGCCGGTGACAAACCGGAGGAAGGTGGGGACGACGTCAAGTCATCATGGC  
CTAAGGAGACTGCCGGTGACAAACCGGAGGAAGGTGGGGACGACGTCAAGTCATCATGGC  
CTAAGGAGACTGCCGGTGACAAACCGGAGGAAGGTGGGGACGACGTCAAGTCATCATGGC  
\*\*\*\*\*

Alteromonas\_mediterranea\_S004067  
Alteromonas\_macleodii\_S000014590  
Alteromonas\_gracilis\_S004263718

CCTTACGTGTAGGGCTACACACGTGCTACAATGGCATTACAGAGGGAAGCGAG-ACAGT  
CCTTACGTGTAGGGCTACACACGTGCTACAATGGCATTACAGAGGGAAGCGAG-ACAGT  
CCTTACGTGTAGGGCTACACACGTGCTACAATGGCATTACAGAGGGAAGCGAGAACAGT  
\*\*\*\*\*

Alteromonas\_mediterranea\_S004067  
Alteromonas\_macleodii\_S000014590  
Alteromonas\_gracilis\_S004263718

GATGTGGAGCGGACCCCTTAAAGAATGTCGTAGTCCGGATTGGAGTCTGCAACTCGACTC  
GATGTGGAGCGGACCCCTTAAAGAATGTCGTAGTCCGGATTGGAGTCTGCAACTCGACTC  
GATGTGGAGCGGACCCCTTAAAGAATGTCGTAGTCCGGATTGGAGTCTGCAACTCGACTC  
\*\*\*\*\*

Alteromonas\_mediterranea\_S004067  
Alteromonas\_macleodii\_S000014590  
Alteromonas\_gracilis\_S004263718

CATGAAGTCGGAATCGCTAGTAATCGCAGGTCAGAATACTGCGGTGAATACGTTCCCGGG  
CATGAAGTCGGAATCGCTAGTAATCGCAGGTCAGAATACTGCGGTGAATACGTTCCCGGG  
CATGAAGTCGGAATCGCTAGTAATCGCAGGTCAGAATACTGCGGTGAATACGTTCCCGGG  
\*\*\*\*\*

Alteromonas\_mediterranea\_S004067  
Alteromonas\_macleodii\_S000014590  
Alteromonas\_gracilis\_S004263718

CCTTGTACACACCGCCCGTACACCATGGGAGTGGGATGCAAAGAAGTAGTTAGTCTAA  
CCTTGTACACACCGCCCGTACACCATGGGAGTGGGATGCAAAGAAGTAGTTAGTCTAA  
CCTTGTACACACCGCCCGTACACCATGGGAGTGGGATGCAAAGAAGTAGTTAGTCTAA



```
*****
Alteromonas_mediterranea_S004067 CCTTCGGGAGGACGATTACCACCTTGTTCATTTGTTTCATGACTGGGGTGAAGTCGTAA
Alteromonas_macleodii_S000014590 CCTTCGGGAGGACGATTACCACCTTG-----TGTTTCATGACTGGGGTGAAGTCGTAA
Alteromonas_gracilis_S004263718 CCTTCGGGAGGACGATAACCACCTTG-----
*****
```

```
Alteromonas_mediterranea_S004067 CAAGGTAACCCTAGGGGAACCTGGGGTTGGATCACCTCCTTA
Alteromonas_macleodii_S000014590 CAAGGTAACCCTAGGGGAACCT-----
Alteromonas_gracilis_S004263718 -----
```

=====

CLUSTAL W (1.81) multiple sequence alignment

```
Arcobacter_cloacae_S003721995 TAACACATGCAAGTCGAACGAGAACGGGATATAGCTTGCTATATTTGTCAGCTAAGTGGC
Arcobacter_defluvii_S002233781 TAACACATGCAAGTCGAACGAGAACGGATTATAGCTTGCTATAATTGTCAGCTAAGTGGC
*****
```

```
Arcobacter_cloacae_S003721995 GCACGGGTGAGTAATGTATAGATAACCTGCCCTTAAGAAAGGAATAACAGTTGGAACGA
Arcobacter_defluvii_S002233781 GCACGGGTGAGTAATGTATAGATAACCTGCCCTTAGAAAGGAATAACAGATGGAACGT
*****
```

```
Arcobacter_cloacae_S003721995 CTGCTAATGCCCTATATGCCTTTAATACATAAGTATGCAAGGAAACGCTTTAGTGCTTA
Arcobacter_defluvii_S002233781 CTGCTAATGCCCTATATGCCTTTAATACATAAGTATGCAAGGAAACGCTTTAGTGCTAG
*****
```

```
Arcobacter_cloacae_S003721995 AGGATGGGTCTGTATGGTATCAGCTTGTTGGTGAGGTAATGGCTCACCAAGGCTATGACG
Arcobacter_defluvii_S002233781 AGGATGGGTCTGTATGGTATCAGCTTGTTGGTGAGGTAATGGCTCACCAAGGCAATGACG
*****
```

```
Arcobacter_cloacae_S003721995 CCTAACTGGTTTGAGAGGATGATCAGTCACACTGGAAGTGGACACGGTCCAGACTCCTA
Arcobacter_defluvii_S002233781 CCTAACTGGTTTGAGAGGATGATCAGTCACACTGGAAGTGGACACGGTCCAGACTCCTA
*****
```

```
Arcobacter_cloacae_S003721995 CGGGAGGCAGCAGTGGGGAATATTGCACAATGGACGAAAGTCTGATGCAGCAACGCCGCG
Arcobacter_defluvii_S002233781 CGGGAGGCAGCAGTGGGGAATATTGCACAATGGACGAAAGTCTGATGCAGCAACGCCGCG
*****
```

```
Arcobacter_cloacae_S003721995 TGGAGGATGACACATTTTCGGTGCCTAAACTCCTTTTATATAGGAAGATAATGACGGTACT
Arcobacter_defluvii_S002233781 TGGAGGATGACACATTTTCGGTGCCTAAACTCCTTTTATATAGGAAGATAATGACGGTACT
*****
```

Arcobacter\_cloacae\_S003721995  
Arcobacter\_defluvii\_S002233781

ATATGAATAAGCACCGGCTAACTCCGTGCCAGCAGCCCGGTAATACGGAGGGTGCAAGC  
ATATGAATAAGCACCGGCTAACTCCGTGCCAGCAGCCCGGTAATACGGAGGGTGCAAGC  
\*\*\*\*\*

Arcobacter\_cloacae\_S003721995  
Arcobacter\_defluvii\_S002233781

GTTACTCGGAATCACTGGGCGTAAAGAGCGTGTAGGCGGGTATATAAGTCAGAAGTGAAA  
GTTACTCGGAATCACTGGGCGTAAAGAGCGTGTAGGCGGGTATATAAGTCAGAAGTGAAA  
\*\*\*\*\*

Arcobacter\_cloacae\_S003721995  
Arcobacter\_defluvii\_S002233781

TCCAATAGCTTAACTATTGAACTGCTTTTGAACGTATACCTAGAATGTGGGAGAGGTA  
TCCAATAGCTTAACTATTGAACTGCTTTTGAACGTATACCTAGAATGTGGGAGAGGTA  
\*\*\*\*\*

Arcobacter\_cloacae\_S003721995  
Arcobacter\_defluvii\_S002233781

GATGGAATTTCTGGTGTAGGGGTAATAATCCGTAGAGATCAGAAGGAATACCGATTGCGAA  
GATGGAATTTCTGGTGTAGGGGTAATAATCCGTAGAGATCAGAAGGAATACCGATTGCGAA  
\*\*\*\*\*

Arcobacter\_cloacae\_S003721995  
Arcobacter\_defluvii\_S002233781

GGCGATCTACTGGAACATTATTGACGCTGAGACGCGAAAGCGTGGGGAGCAAACAGGATT  
GGCGATCTACTGGAACATTATTGACGCTGAGACGCGAAAGCGTGGGGAGCAAACAGGATT  
\*\*\*\*\*

Arcobacter\_cloacae\_S003721995  
Arcobacter\_defluvii\_S002233781

AGATACCCCTGGTAGTCCACGCCCTAAACGATGTACACTAGTTGTTGTGAGGCTCGACCTT  
AGATACCCCTGGTAGTCCACGCCCTAAACGATGTACACTAGTTGTTGTGAGGCTCGACCTT  
\*\*\*\*\*

Arcobacter\_cloacae\_S003721995  
Arcobacter\_defluvii\_S002233781

GCAGTAATGCAGTTAACACATTAAGTGTACCGCCTGGGGAGTACGGTCGCAAGATTA AAA  
GCAGTAATGCAGTTAACACATTAAGTGTACCGCCTGGGGAGTACGGTCGCAAGATTA AAA  
\*\*\*\*\*

Arcobacter\_cloacae\_S003721995  
Arcobacter\_defluvii\_S002233781

CTCAAAGGAATAGACGGGGACCCGCACAAGCGGTGGAGCATGTGGTTTAATTCGACGATA  
CTCAAAGGAATAGACGGGGACCCGCACAAGCGGTGGAGCATGTGGTTTAATTCGACGATA  
\*\*\*\*\*

Arcobacter\_cloacae\_S003721995  
Arcobacter\_defluvii\_S002233781

CACGAAGAACCTTACCTGGACTTGACATAGTAAGA ACTTTCTAGAGATAGATTGGTGTCT  
CACGAAGAACCTTACCTGGACTTGACATAGTAAGA ACTTTCTAGAGATAGATTGGTGTCT  
\*\*\*\*\*

Arcobacter\_cloacae\_S003721995  
Arcobacter\_defluvii\_S002233781

GCTTGCAGAACTTATATACAGGTGCTGCACGGCTGT CGTCAGCTCGTGTCTGAGATGT  
GCTTGCAGAACTTATATACAGGTGCTGCACGGCTGT CGTCAGCTCGTGTCTGAGATGT  
\*\*\*\*\*

Arcobacter\_cloacae\_S003721995  
Arcobacter\_defluvii\_S002233781

TGGGTTAAGTCCCGCAACGAGCGCAACCCTCGTCATTAGTTGCTAACAGTTCGGCTGAGA  
TGGGTTAAGTCCCGCAACGAGCGCAACCCTCGTCATTAGTTGCTAACAGTTCGGCTGAGA  
\*\*\*\*\*

```

Arcobacter_cloacae_S003721995      ACTCTAATGAGACTGCCTACGCAAGTAGGAGGAAGGTGAGGACGACGTCAAGTCATCATG
Arcobacter_defluvii_S002233781     ACTCTAATGAGACTGCCTACGCAAGTAGGAGGAAGGTGAGGACGACGTCAAGTCATCATG
*****

Arcobacter_cloacae_S003721995      GCCCTTACGTCCAGGGCTACACACGTGCTACAATGGGGTATACAAAGAGCAGCAATACGG
Arcobacter_defluvii_S002233781     GCCCTTACGTCCAGGGCTACACACGTGCTACAATGGGGTATACAAAGAGCAGCAATACAG
***** *

Arcobacter_cloacae_S003721995      TGACGTGGAGCAAATCTCAAAAATATCTCCCAGTTCGGATTGTAGTCTGCAACTCGACTA
Arcobacter_defluvii_S002233781     TGATGTGGAGCAAATCTCAAAAATATCTCCCAGTTCGGATTGTAGTCTGCAACTCGACTA
*** *****

Arcobacter_cloacae_S003721995      CATGAAGTTGGAATCGCTAGTAATCGTAGATCAGCTATGCTACGGTGAATACGTTCCCGG
Arcobacter_defluvii_S002233781     CATGAAGTTGGAATCGCTAGTAATCGTAGATCAGCTATGCTACGGTGAATACGTTCCCGG
*****

Arcobacter_cloacae_S003721995      GTCTTGTACTIONCACCCCGGTCACACCATGGGAGTTGAACTCATTCGAAGCGGGGATGCTA
Arcobacter_defluvii_S002233781     GTCTTGTACTIONCACCCCGGTCACACCATGGGAGTTGAACTCATTCGAAGCGGGGATGCTA
*****

Arcobacter_cloacae_S003721995      AAGTAGCTACCTTCCACAGTGG
Arcobacter_defluvii_S002233781     AAGTAGCTACCTTCCACAGTGG
*****

```

=====  
CLUSTAL W (1.81) multiple sequence alignment

```

Bradyrhizobium_lupini_S000014939  -----AGAGTTTGATNNTGGCTCAGAGCGAACGCTGGCGGCAGGCTT
Bradyrhizobium_ganzhouense_S0039  -----
Bradyrhizobium_cytisi_S001743519  TCCGAATTCGTCGACAACAGAGTTTGATCCTGGCTCAGAGCGAACGCTGGCGGCAGGCTT

Bradyrhizobium_lupini_S000014939  AACACATGCAAGTCGAGCGGGCGTAGCAATACGTCAGCGGCAGACGGGTGAGTAACGCGT
Bradyrhizobium_ganzhouense_S0039  ----ATGCAAGTCGAGCGGGCGTAGCAATACGTCAGCGGCAGACGGGTGAGTAACGCGT
Bradyrhizobium_cytisi_S001743519  AACACATGCAAGTCGAGCGGGCGTAGCAATACGTCAGCGGCAGACGGGTGAGTAACGCGT
*****

Bradyrhizobium_lupini_S000014939  GGGAACGTACCTTTTGGTTCGGAACAACACAGGGAAACTTGTGCTAATACCGGATAAGCC
Bradyrhizobium_ganzhouense_S0039  GGGAACGTACCTTTTGGTTCGGAACAACACAGGGAAACTTGTGCTAATACCGGATAAGCC
Bradyrhizobium_cytisi_S001743519  GGGAACATACCTTTTGGTTCGGAACAACACAGGGAAACTTGTGCTAATACCGGATAAGCC
*****

Bradyrhizobium_lupini_S000014939  CTTACGGGGAAAGATTTATCGCCGAAAGATCGGCCCGCTCTGATTAGCTAGTTGGTGAG

```

Bradyrhizobium\_ganzhouense\_S0039 CTTACGGGGAAAGATTTATCGCCGAAAGATCGGCCCGGTCTGATTAGCTAGTTGGTAGG  
Bradyrhizobium\_cytisi\_S001743519 CTTACGGGGAAAGATTTATCGCCGAAAGATTTGGCCCGGTCTGATTAGCTAGTTGGTAGG  
\*\*\*\*\*

Bradyrhizobium\_lupini\_S000014939 GTAATGGCTACCAAGGCGACGATCAGTAGCTGGTCTGAGAGGATGATCAGCCACATTGG  
Bradyrhizobium\_ganzhouense\_S0039 GTAATGGCTACCAAGGCGACGATCAGTAGCTGGTCTGAGAGGATGATCAGCCACATTGG  
Bradyrhizobium\_cytisi\_S001743519 GTAATGGCTACCAAGGCGACGATCAGTAGCTGGTCTGAGAGGATGATCAGCCACATTGG  
\*\*\*\*\*

Bradyrhizobium\_lupini\_S000014939 GACTGAGACACGGCCCAAACCTCTACGGGAGGCAGCAGTGGGGAATATTGGACAATGGGG  
Bradyrhizobium\_ganzhouense\_S0039 GACTGAGACACGGCCCAAACCTCTACGGGAGGCAGCAGTGGGGAATATTGGACAATGGGG  
Bradyrhizobium\_cytisi\_S001743519 GACTGAGACACGGCCCAAACCTCTACGGGAGGCAGCAGTGGGGAATATTGGACAATGGGG  
\*\*\*\*\*

Bradyrhizobium\_lupini\_S000014939 GCAACCCGTATCCAGCCATGCCGCGTGAGTGATGAAGGCCCTAGGGTTGTAAAGCTCTTT  
Bradyrhizobium\_ganzhouense\_S0039 GCAACCCGTATCCAGCCATGCCGCGTGAGTGATGAAGGCCCTAGGGTTGTAAAGCTCTTT  
Bradyrhizobium\_cytisi\_S001743519 GCAACCCGTATCCAGCCATGCCGCGTGAGTGATGAAGGCCCTAGGGTTGTAAAGCTCTTT  
\*\*\*\*\*

Bradyrhizobium\_lupini\_S000014939 TGTGCGGGGAAGATAATGACGGTACCGCAAGAATAAGCCCCGGCTAACTTCGTGCCAGCAG  
Bradyrhizobium\_ganzhouense\_S0039 TGTGCGGGGAAGATAATGACGGTACCGCAAGAATAAGCCCCGGCTAACTTCGTGCCAGCAG  
Bradyrhizobium\_cytisi\_S001743519 TGTGCGGGGAAGATAATGACGGTACCGCAAGAATAAGCCCCGGCTAACTTCGTGCCAGCAG  
\*\*\*\*\*

Bradyrhizobium\_lupini\_S000014939 CCGCGGTAATACGAAGGGGGCTAGCGTTGCTCGGAATCACTGGGCGTAAAGGGTGCGTAG  
Bradyrhizobium\_ganzhouense\_S0039 CCGCGGTAATACGAAGGGGGCTAGCGTTGCTCGGAATCACTGGGCGTAAAGGGTGCGTAG  
Bradyrhizobium\_cytisi\_S001743519 CCGCGGTAATACGAAGGGGGCTAGCGTTGCTCGGAATCACTGGGCGTAAAGGGTGCGTAG  
\*\*\*\*\*

Bradyrhizobium\_lupini\_S000014939 GCGGGTCTTTAAGTCAGGGGTGAAATCCTGGAGCTCAACTCCAGAATGCCTTTGATACT  
Bradyrhizobium\_ganzhouense\_S0039 GCGGGTCTTTAAGTCAGGGGTGAAATCCTGGAGCTCAACTCCAGAATGCCTTTGATACT  
Bradyrhizobium\_cytisi\_S001743519 GCGGGTCTTTAAGTCAGGGGTGAAATCCTGGAGCTCAACTCCAGAATGCCTTTGATACT  
\*\*\*\*\*

Bradyrhizobium\_lupini\_S000014939 GAGGATCTTGAGTTCGGGAGAGGTGAGTGGAAGTGCAGTGTAGAGGTGAAATTCGTAGA  
Bradyrhizobium\_ganzhouense\_S0039 GAAGATCTTGAGTCCGGGAGAGGTGAGTGGAAGTGCAGTGTAGAGGTGAAATTCGTAGA  
Bradyrhizobium\_cytisi\_S001743519 GAAGATCTTGAGTCCGGGAGAGGTGAGTGGAAGTGCAGTGTAGAGGTGAAATTCGTAGA  
\*\* \*\*\*\*\*

Bradyrhizobium\_lupini\_S000014939 TATTTCGCAAGAACACCAGTGGCGAAGGCGGCTCACTGGCCCGATACTGACGCTGAGGCAC  
Bradyrhizobium\_ganzhouense\_S0039 TATTTCGCAAGAACACCAGTGGCGAAGGCGGCTCACTGGCCCGGATACTGACGCTGAGGCAC  
Bradyrhizobium\_cytisi\_S001743519 TATTTCGCAAGAACACCAGTGGCGAAGGCGGCTCACTGGCCCGGATACTGACGCTGAGGCAC  
\*\*\*\*\*



```

Bradyrhizobium_cytisi_S001743519      GGTGACAATGGGACGCTAAGGGGCAACCCTTCGCAAATCTCAAAAAGCCGTCTCAGTTCG
*****
Bradyrhizobium_lupini_S000014939      GATTGGGCTCTGCAACTCGAGCCCATGAAGTTGGAATCGCTAGTAATCGTGGATCAGCAC
Bradyrhizobium_ganzhouense_S0039      GATTGGGCTCTGCAACTCGAGCCCATGAAGTTGGAATCGCTAGTAATCGTGGATCAGCAC
Bradyrhizobium_cytisi_S001743519      GATTGGGCTCTGCAACTCGAGCCCATGAAGTTGGAATCGCTAGTAATCGTGGATCAGCAC
*****
Bradyrhizobium_lupini_S000014939      GCCACGGTGAATACGTTCCCGGGCCTTGTACACACCGCCCGTCACACCATGGGAGTTGGT
Bradyrhizobium_ganzhouense_S0039      GCCACGGTGAATACGTTCCCGGGCCTTGTACACACCGCCCGTCACACCATGGGAGTTGGT
Bradyrhizobium_cytisi_S001743519      GCCACGGTGAATACGTTCCCGGGCCTTGTACACACCGCCCGTCACACCATGGGAGTTGGT
*****
Bradyrhizobium_lupini_S000014939      TTTACCTGAAGACGGTGCCTAACCAGCAAGGGAGGCAGCCGCCACGGTAGGGTCAGCG
Bradyrhizobium_ganzhouense_S0039      TTTACCTGAAGACGGTGCCTAACCAGCAATGGAGGCAGCCGCCACG-----
Bradyrhizobium_cytisi_S001743519      TTTACCTGAAGACGGTGCCTAACCAGCAATGGAGGCAGCCGCCACGGTAGGGTCAGCG
*****
Bradyrhizobium_lupini_S000014939      ACTGGGGTGAAGTCGTAACAAGGTAGCCGTAGGGGAACCTGCGGCTGGATCACCTCCTTT
Bradyrhizobium_ganzhouense_S0039      -----
Bradyrhizobium_cytisi_S001743519      ACTGGGGTGAAGTCGTAACAAGGTAGCCGTAGGGGAACCTGCGGCTGGATCACCTCCTTA

Bradyrhizobium_lupini_S000014939      NN-----
Bradyrhizobium_ganzhouense_S0039      -----
Bradyrhizobium_cytisi_S001743519      AGCTTGGATCCCGGA

```

```

=====
CLUSTAL W (1.81) multiple sequence alignment

Burkholderia_fungorum_S000389260      -----GCGGCATGCCTTACACATGCAAGTCGAAC
Burkholderia_phytofirmans_S00054      AGAGTTTGATCCTGGCTCAGATTGAACGCTGGCGGCATGCCTTACACATGCAAGTCGAAC
*****

Burkholderia_fungorum_S000389260      GGCAGCACGGGGCAA-CCCTGGTGGCGAGTGGCGAACGGGTGAGTAATACATCGGAACG
Burkholderia_phytofirmans_S00054      GGCAGCACGGGGCAACCCCTGGTGGCGAGTGGCGAACGGGTGAGTAATACATCGGAACG
*****

Burkholderia_fungorum_S000389260      TGTCCGTAGTGGGGATAGCCCGCGAAAGCCGGATTAATACGCATACGCTCTACGGA
Burkholderia_phytofirmans_S00054      TGTCCGTAGTGGGGATAGCCCGCGAAAGCCGGATTAATACGCATACGATCTGTGGA
*****

Burkholderia_fungorum_S000389260      GGAAAGGGGGGATCTTAGGACCTCCCGCTACAGGGCGGCCGATGGCAGATTAGCTAGT

```

Burkholderia\_phytofirmans\_S00054 TGAAAGCGGGGATCTTAGGACCTCGCGCTACAGGGGCGCCGATGGCAGATTAGCTAGT  
\*\*\*\*\*

Burkholderia\_fungorum\_S000389260 TGGTGGGGTAAAGGCTACCAAGGCGACGATCTGTAGCTGGTCTGAGAGGACGACCAGCC  
Burkholderia\_phytofirmans\_S00054 TGGTGGGGTAAAGGCTACCAAGGCGACGATCTGTAGCTGGTCTGAGAGGACGACCAGCC  
\*\*\*\*\*

Burkholderia\_fungorum\_S000389260 ACACTGGGACTGAGACACGGCCCAGACTCCTACGGGAGGCAGCAGTGGGAATTTGGAC  
Burkholderia\_phytofirmans\_S00054 ACACTGGGACTGAGACACGGCCCAGACTCCTACGGGAGGCAGCAGTGGGAATTTGGAC  
\*\*\*\*\*

Burkholderia\_fungorum\_S000389260 AATGGGGCAACCCGTATCCAGCAATGCCGCGTGTGTGAAGAAGGCCTTCGGGTTGTAAA  
Burkholderia\_phytofirmans\_S00054 AATGGGGCAACCCGTATCCAGCAATGCCGCGTGTGTGAAGAAGGCCTTCGGGTTGTAAA  
\*\*\*\*\*

Burkholderia\_fungorum\_S000389260 GCACCTTTTGTCCGGAAGAAAACGCCGTGGTAAATACCCGTGGCGGATGACGGTACCGGA  
Burkholderia\_phytofirmans\_S00054 GCACCTTTTGTCCGGAAGAAAACCTCTTGGTAAATACCTGAGGGGGATGACGGTACCGGA  
\*\*\*\*\*

Burkholderia\_fungorum\_S000389260 AGAATAAGCACCCGGCTAACTACGTGCCAGCAGCCGCGTAATACGTAGGGTGCAAGCGTT  
Burkholderia\_phytofirmans\_S00054 AGAATAAGCACCCGGCTAACTACGTGCCAGCAGCCGCGTAATACGTAGGGTGCAAGCGTT  
\*\*\*\*\*

Burkholderia\_fungorum\_S000389260 AATCGGAATTACTGGGCGTAAAGCGTGCGCAGGCGGTCCGCTAAGACAGATGTGAAATCC  
Burkholderia\_phytofirmans\_S00054 AATCGGAATTACTGGGCGTAAAGCGTGCGCAGGCGGTCCGCTAAGACAGATGTGAAATCC  
\*\*\*\*\*

Burkholderia\_fungorum\_S000389260 CCGGGCTTAACCTGGGAAGTGCATTTGTGACTGGCGGGCTAGAGTATGGCAGAGGGGGT  
Burkholderia\_phytofirmans\_S00054 CCGGGCTTAACCTGGGAAGTGCATTTGTGACTGGCGGGCTAGAGTATGGCAGAGGGGGT  
\*\*\*\*\*

Burkholderia\_fungorum\_S000389260 AGAATTCACGTGTAGCAGTGAATGCGTAGAGATGTGGAGGAATACCGATGGCGAAGGC  
Burkholderia\_phytofirmans\_S00054 AGAATTCACGTGTAGCAGTGAATGCGTAGAGATGTGGAGGAATACCGATGGCGAAGGC  
\*\*\*\*\*

Burkholderia\_fungorum\_S000389260 AGCCCCCTGGGCCAATACTGACGCTCATGCACGAAAGCGTGGGGAGCAAACAGGATTAGA  
Burkholderia\_phytofirmans\_S00054 AGCCCCCTGGGCCAATACTGACGCTCATGCACGAAAGCGTGGGGAGCAAACAGGATTAGA  
\*\*\*\*\*

Burkholderia\_fungorum\_S000389260 TACCCTGGTAGTCCACGCCCTAAACGATGTCAACTAGTTGTCGGGTCTTCATTGACTTGG  
Burkholderia\_phytofirmans\_S00054 TACCCTGGTAGTCCACGCCCTAAACGATGTCAACTAGTTGTCGGGTCTTCATTGACTTGG  
\*\*\*\*\*

Burkholderia\_fungorum\_S000389260  
Burkholderia\_phytofirmans\_S00054

TAACGTAGCTAACGCGTGAAGTTGACCGCCTGGGGAGTACGGTCGCAAGATTAAACTCA  
TAACGTAGCTAACGCGTGAAGTTGACCGCCTGGGGAGTACGGTCGCAAGATTAAACTCA  
\*\*\*\*\*

Burkholderia\_fungorum\_S000389260  
Burkholderia\_phytofirmans\_S00054

AAGGAATTGACGGGGACCCGCACAAGCGGTGGATGATGTGGATTAATTCGATGCAACGCG  
AAGGAATTGACGGGGACCCGCACAAGCGGTGGATGATGTGGATTAATTCGATGCAACGCG  
\*\*\*\*\*

Burkholderia\_fungorum\_S000389260  
Burkholderia\_phytofirmans\_S00054

AAAAACCTTACCTACCTTGACATGTATGGAATCCTGCTGAGAGGTGGGAGTGCCCGAAA  
AAAAACCTTACCTACCTTGACATGTATGGAATCCTGCTGAGAGGTGGGAGTGCCCGAAA  
\*\*\*\*\*

Burkholderia\_fungorum\_S000389260  
Burkholderia\_phytofirmans\_S00054

GGGAGCCATAACACAGGTGCTGCATGGCTGTGTCAGCTCGTGTCTGAGATGTTGGGTT  
GGGAGCCATAACACAGGTGCTGCATGGCTGTGTCAGCTCGTGTCTGAGATGTTGGGTT  
\*\*\*\*\*

Burkholderia\_fungorum\_S000389260  
Burkholderia\_phytofirmans\_S00054

AAGTCCCAGAACGAGCGCAACCCTTGTCCTAGTTGCTACGCAAGAGCACTCTAGGGAGA  
AAGTCCCAGAACGAGCGCAACCCTTGTCCTAGTTGCTACGCAAGAGCACTCTAGGGAGA  
\*\*\*\*\*

Burkholderia\_fungorum\_S000389260  
Burkholderia\_phytofirmans\_S00054

CTGCCGGTGACAAACCGGAGGAAGGTGGGGATGACGTCAAGTCTCATGGCCCTTATGGG  
CTGCCGGTGACAAACCGGAGGAAGGTGGGGATGACGTCAAGTCTCATGGCCCTTATGGG  
\*\*\*\*\*

Burkholderia\_fungorum\_S000389260  
Burkholderia\_phytofirmans\_S00054

TAGGGCTTCACACGTCATACAATGGTCGGAACAGAGGGTCGCCAACCCGCGAGGGGAGC  
TAGGGCTTCACACGTCATACAATGGTCGGAACAGAGGGTCGCCAACCCGCGAGGGGAGC  
\*\*\*\*\*

Burkholderia\_fungorum\_S000389260  
Burkholderia\_phytofirmans\_S00054

CAATCCCAGAAAACCGATCGTAGTCCGGATCGCACTCTGCAACTCGAGTGCGTGAAGCTG  
CAATCCCAGAAAACCGATCGTAGTCCGGATCGCACTCTGCAACTCGAGTGCGTGAAGCTG  
\*\*\*\*\*

Burkholderia\_fungorum\_S000389260  
Burkholderia\_phytofirmans\_S00054

GAATCGCTAGTAATCGCGGATCAGCATGCCGCGGTGAATACGTTCCCGGTCTTGTACAC  
GAATCGCTAGTAATCGCGGATCAGCATGCCGCGGTGAATACGTTCCCGGTCTTGTACAC  
\*\*\*\*\*

Burkholderia\_fungorum\_S000389260  
Burkholderia\_phytofirmans\_S00054

ACCGCCCGTCACACCATGGGAGTGGGTTTTACCAGAAGTGGCTAGTCTAACCGCAAGGAG  
ACCGCCCGTCACACCATGGGAGTGGGTTTTACCAGAAGTGGCTAGTCTAACCGCAAGGAG  
\*\*\*\*\*

Burkholderia\_fungorum\_S000389260  
Burkholderia\_phytofirmans\_S00054

GACGGTCAACACGGTAGGATTCATGACTGGGGTGAAGTCGTAACAAGGTAGCCGTATCGG  
GACGGTCAACACGGTAGGATTCATGACTGGGGTGAAGTCGTAACAAGGTAGCCGTATCGG  
\*\*\*\*\*



Burkholderia\_fungorum\_S000389260 AAGG  
Burkholderia\_phytofirmans\_S00054 ----

=====  
CLUSTAL W (1.81) multiple sequence alignment

Epibacterium\_ulvae\_S003278975 -----GC-AGTCGAGCGCGCCCTTCGGGGTGAAGCGG  
Shimia\_marina\_S000515801 AACGAACGCTGGCGGCAGGCCTAACACATGCAAGTCGAGCGCGCCCTTCGGGGTGAAGCGG  
\*\* \*\*\*\*\*

Epibacterium\_ulvae\_S003278975 CGGACGGGTTAGTAACGCGTGGGAATATACCCTTTGGTAAGGAATAGCCTCTGGAAACGG  
Shimia\_marina\_S000515801 CGGACGGGTTAGTAACGCGTGGGAACGTACCCAGATCTACGGAATAGCCTTTGGAAACGA  
\*\*\*\*\* \*\* \*\*\*\*\*

Epibacterium\_ulvae\_S003278975 AGAGTAATACCTTATGTGCCCTTCGGGGGAAAGATTTATCGCCAAAGGATTAGCCCGCGT  
Shimia\_marina\_S000515801 AGAGTAATACCGTATACGCCCTTCGGGGGAAAGATTTATCGGATTTGGATCGGCCCGCGT  
\*\*\*\*\* \*\* \*\*\*\*\*

Epibacterium\_ulvae\_S003278975 TAGATTAGATAGTTGGTGGGTAATGGCCTACCAAGTCTACGATCTATAGCTGGTTTTAG  
Shimia\_marina\_S000515801 TAGATTAGATAGTTGGTGGGTAACGGCCTACCAAGTCTACGATCTATAGCTGGTTTTAG  
\*\*\*\*\*

Epibacterium\_ulvae\_S003278975 AGGATGATCAGCAAACTGGGACTGAGACACGGCCAGACTCCTACGGGAGGCAGCAGTC  
Shimia\_marina\_S000515801 AGGATGATCAGCAAACTGGGACTGAGACACGGCCAGACTCCTACGGGAGGCAGCAGTC  
\*\*\*\*\*

Epibacterium\_ulvae\_S003278975 GGGAAATCTTGGACAATGGGGCAACCTGATCCAGCCATGCCGCGTGAGCGATGAAGGCC  
Shimia\_marina\_S000515801 GGGAAATCTTGGACAATGGGGCAAGCCTGATCCAGCCATGCCGCGTGAGCGATGAAGGCC  
\*\*\*\*\*

Epibacterium\_ulvae\_S003278975 TTAGGGTCGTAAAACCTTTTCGCCAGAGATGATAATGACAGTATCTGGTAAAGAAACCCC  
Shimia\_marina\_S000515801 TTAGGGTCGTAAAACCTTTTCGCCAGGGATGATAATGACAGTACCTGGTAAAGAAACCCC  
\*\*\*\*\*

Epibacterium\_ulvae\_S003278975 GGCTAACTCCGTGCCAGCAGCCGCGGTAATACGGAGGGGGTTAGCGTTGTTTCGGAATTAC  
Shimia\_marina\_S000515801 GGCTAACTCCGTGCCAGCAGCCGCGGTAATACGGAGGGGGTTAGCGTTGTTTCGGAATTAC  
\*\*\*\*\*

Epibacterium\_ulvae\_S003278975 TGGGCGTAAAGCGCACGTAGGCGGATTGGAAAGTTAGAGGTGAAATCCCGGGGCTCAACC  
Shimia\_marina\_S000515801 TGGGCGTAAAGCGCGCGTAGGCGGTTGTTAAGTTAGAGGTGAAATCCCGGGGCTCAACC  
\*\*\*\*\*

Epibacterium\_ulvae\_S003278975  
Shimia\_marina\_S000515801  
CCGGAAGTGCCTTTAAAAGTCCAGTCTAGAGTTCGAGAGAGGTGAGTGGAATTCGGAGT  
CCGGAAGTGCCTTTAATACTGGCAACCTAGAGTTCGAGAGAGGTGAGTGGAATTCGGAGT  
\*\*\*\*\* \*\* \*\* \*\*\*\*\*

Epibacterium\_ulvae\_S003278975  
Shimia\_marina\_S000515801  
GTAGAGGTGAAATTCGTAGATATTCGGAGGAACACCAGTGGCGAAGGCGGCTCACTGGCT  
GTAGAGGTGAAATTCGTAGATATTCGGAGGAACACCAGTGGCGAAGGCGGCTCACTGGCT  
\*\*\*\*\*

Epibacterium\_ulvae\_S003278975  
Shimia\_marina\_S000515801  
CGATACTGACGCTGAGGTGCGAAAGTGTGGGGAGCAAACAGGATTAGATACCCTGGTAGT  
CGATACTGACGCTGAGGTGCGAAAGTGTGGGGAGCAAACAGGATTAGATACCCTGGTAGT  
\*\*\*\*\*

Epibacterium\_ulvae\_S003278975  
Shimia\_marina\_S000515801  
CCACACCGTAAACGATGAATGCCAGTCGTGGGTAGCATGCTATTCGGTGACACACCTAA  
CCACACCGTAAACGATGAATGCCAGTCGTGGGTAGCATGCTATTCGGTGACACACCTAA  
\*\*\*\*\*

Epibacterium\_ulvae\_S003278975  
Shimia\_marina\_S000515801  
CGGATTAAGCATTCCGCCTGGGGAGTACGGTCGCAAGATTAAAAGTCAAAGGAATTGACG  
CGGATTAAGCATTCCGCCTGGGGAGTACGGTCGCAAGATTAAAAGTCAAAGGAATTGACG  
\*\*\*\*\*

Epibacterium\_ulvae\_S003278975  
Shimia\_marina\_S000515801  
GGGGCCCGCACAAGCGGTGGAGCATGTGGTTTAATTCGAAGCAACGCGCAGAACCTTACC  
GGGGCCCGCACAAGCGGTGGAGCATGTGGTTTAATTCGAAGCAACGCGCAGAACCTTACC  
\*\*\*\*\*

Epibacterium\_ulvae\_S003278975  
Shimia\_marina\_S000515801  
AACCTTGACATCCTAGGACAACCTCCAGAGATGGAGCCTTCCTTCGGGACCTAGTGACAG  
AACCTTGACATCCTAGGACAACCTCCAGAGATGGAGCCTTCCTTCGGGACCTAGTGACAG  
\*\*\*\*\*

Epibacterium\_ulvae\_S003278975  
Shimia\_marina\_S000515801  
GTGCTGCATGGCTGTCGTAGCTCGTGTGCGTGAGATGTTCCGGTTAAGTCCGGCAACGAGC  
GTGCTGCATGGCTGTCGTAGCTCGTGTGCGTGAGATGTTCCGGTTAAGTCCGGCAACGAGC  
\*\*\*\*\*

Epibacterium\_ulvae\_S003278975  
Shimia\_marina\_S000515801  
GCAACCCACATCTTTAGTTGCCAGCAGTTCGGCTGGGCACTCTAGAGAAACTGCCCGTGA  
GCAACCCACATCTTTAGTTGCCAGCAGTTCGGCTGGGCACTCTAGAGAAACTGCCCGTGA  
\*\*\*\*\*

Epibacterium\_ulvae\_S003278975  
Shimia\_marina\_S000515801  
TAAGCGGGAGGAAGGTGTGGATGACGTCAGTCAAGTCCATGGCCCTTACGGGTTGGGCTACA  
TAAGCGGGAGGAAGGTGTGGATGACGTCAGTCAAGTCCATGGCCCTTACGGGTTGGGCTACA  
\*\*\*\*\*

Epibacterium\_ulvae\_S003278975  
Shimia\_marina\_S000515801  
CACGTGCTACAATGGCATCTACAGTGGGTTAATCCCAAAAGATGTCTCAGTTCGGATTG  
CACGTGCTACAATGGCATCTACAGTGGGTTAATCCCAAAAGATGTCTCAGTTCGGATTG

```

*****          ***          *****

Epibacterium_ulvae_S003278975      TTCTCTGCAACTCGAGAGCATGAAGTCGGAATCGCTAGTAATCGCGTAACAGCATGACGC
Shimia_marina_S000515801           GGTCTGCAACTCGACCCCATGAAGTCGGAATCGCTAGTAATCGCGTAACAGCATGACGC
                                   *****          *****

Epibacterium_ulvae_S003278975      GGTGAATACGTTCCCGGGCCTTGTACACACCGCCCGTCACACCATGGGAGTTGGGTCTAC
Shimia_marina_S000515801           GGTGAATACGTTCCCGGGCCTTGTACACACCGCCCGTCACACCATGGGAGTTGGTCTAC
                                   *****          *****

Epibacterium_ulvae_S003278975      CCGACGGCCGTGCGCCAACCTTCGAGGGGCATCGAC-----
Shimia_marina_S000515801           CCGACGGCCGTGCGCTAACCTTTTGGAGGCAGCGACCACGGTAGGATCAGCGACTGGGG
                                   *****          *   *   *

Epibacterium_ulvae_S003278975      --
Shimia_marina_S000515801           TG

```

=====  
CLUSTAL W (1.81) multiple sequence alignment

```

Pseudoalteromonas_mariniglutinos      -----CACATGCAAGTCGAGC
Pseudoalteromonas_arabiensis_S00      -GAGTTTGATCCTGGCTCAGATTGAACGCTGGCGGCAGGCCTAACACATGCAAGTCGAGC
Pseudoalteromonas_lipolytica_S00      AGAGTTTGATCCTGGCTCAGATTGAACGCTGGCGGCAGGCCTAACACATGCAAGTCGAGC
Pseudoalteromonas_donghaensis_S0      AGAGTTTGATCATGGCTCAGATTGAACGCTGGCGGCAGGCCTAACACATGCAAGTCGAGC
                                   *****

Pseudoalteromonas_mariniglutinos      GGTAACATTC-TAGCTTGCTA-GAAGATGACGAGCGGCGGACGGGTGAGTAATGCTTGG
Pseudoalteromonas_arabiensis_S00      GGAAACGAAGAGGAGCTTGCTCCTTTGGCGTCGAGCGGCGGACGGGTGAGTAATGCTTGG
Pseudoalteromonas_lipolytica_S00      GGTAACAGAGAGTAGCTTGCTACTCTGCTGACGAGCGGCGGACGGGTGAGTAATGCTTGG
Pseudoalteromonas_donghaensis_S0      GGTAACAGAGAGTAGCTTGCTACTCTGCTGACGAGCGGCGGACGGGTGAGTAATGCTTGG
                                   **  **          *   *   *

Pseudoalteromonas_mariniglutinos      GAATATGCCTTTTGGTGGGGGACAACAGTTGAAACGACTGCTAATACCGCATGATGTCT
Pseudoalteromonas_arabiensis_S00      GAATGTGCCTTATGGTGGGGGACAACAGTTGAAACGACTGCTAATACCGCATAATGTCT
Pseudoalteromonas_lipolytica_S00      GAATGTACCTTATGGTGGGGGACAACAGTTGAAACGACTGCTAATACCGCATAATGTCT
Pseudoalteromonas_donghaensis_S0      GAATGTACCTTATGGTGGGGGACAACAGTTGAAACGACTGCTAATACCGCATAATGTCT
                                   **** *  **** *****

Pseudoalteromonas_mariniglutinos      ACGGACCAAAGTGGGGGACCTTCGGGCCTCACGCCAAAAGATTAGCCCAAGTGGGATTAG
Pseudoalteromonas_arabiensis_S00      TCGGACCAAAGTGGGGGACCTTCGGGCCTCACGCCATAAGATCAGCCCAAGTGGGATTAG
Pseudoalteromonas_lipolytica_S00      TCGGACCAAAGCGGGGGACCTTCGGGCCTCGCGCCATAAGATCAGCCCAAGTGGGATTAG

```

Pseudoalteromonas\_donghaensis\_S0 TCGGACCAAAGCGGGGACCTTCGGGCCTCGCGCCATAAGATCAGCCCAAGTGGGATTAG  
\*\*\*\*\*

Pseudoalteromonas\_mariniglutinos CTAGTTGGTAAGGTAATGGCTTACCAAGGCGACGATCCCTAGCTGGTTTGAGAGGATGAT  
Pseudoalteromonas\_arabiensis\_S00 CTAGTTGGTAAGGTAATGGCTTACCAAGGCGACGATCCCTAGCTGGTTTGAGAGGATGAT  
Pseudoalteromonas\_lipolytica\_S00 CTAGTTGGTGAGGTAATGGCTCACCAAGGCGACGATCCCTAGCTGGTTTGAGAGGATGAT  
Pseudoalteromonas\_donghaensis\_S0 CTAGTTGGTGAGGTAATGGCTCACCAAGGCGACGATCCCTAGCTGGTTTGAGAGGATGAT  
\*\*\*\*\*

Pseudoalteromonas\_mariniglutinos CAGCCACACTGGGACTGAGACACGGCCAGACTCCTACGGGAGGCAGCAGTGGGGAATAT  
Pseudoalteromonas\_arabiensis\_S00 CAGCCACACTGGGACTGAGACACGGCCAGACTCCTACGGGAGGCAGCAGTGGGGAATAT  
Pseudoalteromonas\_lipolytica\_S00 CAGCCACACTGGGACTGAGACACGGCCAGACTCCTACGGGAGGCAGCAGTGGGGAATAT  
Pseudoalteromonas\_donghaensis\_S0 CAGCCACACTGGGACTGAGACACGGCCAGACTCCTACGGGAGGCAGCAGTGGGGAATAT  
\*\*\*\*\*

Pseudoalteromonas\_mariniglutinos TGCACAATGGGCGCAAGCCTGATGCAGCCATGCCGCGTGTGTGAAGAAGGCCTTCGGGTT  
Pseudoalteromonas\_arabiensis\_S00 TGCACAATGGGCGCAAGCCTGATGCAGCCATGCCGCGTGTGTGAAGAAGGCCTTCGGGTT  
Pseudoalteromonas\_lipolytica\_S00 TGCACAATGGGCGCAAGCCTGATGCAGCCATGCCGCGTGTGTGAAGAAGGCCTTCGGGTT  
Pseudoalteromonas\_donghaensis\_S0 TGCACAATGGGCGCAAGCCTGATGCAGCCATGCCGCGTGTGTGAAGAAGGCCTTCGGGTT  
\*\*\*\*\*

Pseudoalteromonas\_mariniglutinos GTAAAGCACTTTCAGTAAGGAGGAAAGGTTAAGTGTAAATAGCACTTAGCTGTGACGTTA  
Pseudoalteromonas\_arabiensis\_S00 GTAAAGCACTTTCAGTAAGGAGGAAAGGTTAAGTGTAAATAGCACTTAGCTGTGACGTTA  
Pseudoalteromonas\_lipolytica\_S00 GTAAAGCACTTTCAGTAAGGAGGAAAGGTTGGATGTAAATAGCATTACAGCTGTGACGTTA  
Pseudoalteromonas\_donghaensis\_S0 GTAAAGCACYTTCAGTAAGGAGGAAAGGTTGGATGTAAATAGCATTACAGCTGTGACGTTA  
\*\*\*\*\*

Pseudoalteromonas\_mariniglutinos CTTACAGAAGAAGCACCGGCTAACTCCGTGCCAGCAGCCGCGGTAATACGGAGGGTGCGA  
Pseudoalteromonas\_arabiensis\_S00 CTTACAGAAGAAGCACCGGCTAACTCCGTGCCAGCAGCCGCGGTAATACGGAGGGTGCGA  
Pseudoalteromonas\_lipolytica\_S00 CTTACAGAAGAAGCACCGGCTAACTCCGTGCCAGCAGCCGCGGTAATACGGAGGGTGCGA  
Pseudoalteromonas\_donghaensis\_S0 CTTACAGAAGAAGCACCGGCTAACTCCGTGCCAGCAGCCGCGSATAATACGGAGGGTGCGA  
\*\*\*\*\*

Pseudoalteromonas\_mariniglutinos GCGTTAATCGGAATTACTGGGCGTAAAGCGTACGCAGGCGGTTTGTTAAGCGAGATGTGA  
Pseudoalteromonas\_arabiensis\_S00 GCGTTAATCGGAATTACTGGGCGTAAAGCGTACGCAGGCGGTTTGTTAAGCGAGATGTGA  
Pseudoalteromonas\_lipolytica\_S00 GCGTTAATCGGAATTACTGGGCGTAAAGCGTACGCAGGCGGTTTGTTAAGCGAGATGTGA  
Pseudoalteromonas\_donghaensis\_S0 GCGTTAATCGGAATTACTGGGCGTAAAGCGTACGCAGGCGGTTTGTTAAGCGAGATGTGA  
\*\*\*\*\*

Pseudoalteromonas\_mariniglutinos AAGCCCCGGGCTCAACTGGGAATGCATTTCGAACTGGCAAACCTAGAGTGTGATAGAGG  
Pseudoalteromonas\_arabiensis\_S00 AAGCCCCGGGCTCAACTGGGAATGCATTTCGAACTGGCAAACCTAGAGTGTGATAGAGG  
Pseudoalteromonas\_lipolytica\_S00 AAGCCCCGGGCTCAACTGGGAATGCATTTCGAACTGGCAAACCTAGAGTGTGATAGAGG  
Pseudoalteromonas\_donghaensis\_S0 AAGCCCCGGGCTCAACTGGGAATGCATTTCGAACTGGCAAACCTAGAGTGTGATAGAGG

\*\*\*\*\*

Pseudoalteromonas\_mariniglutinos  
Pseudoalteromonas\_arabiensis\_S00  
Pseudoalteromonas\_lipolytica\_S00  
Pseudoalteromonas\_donghaensis\_S0

GTGGTAGAATTTTCAGGTGTAGCGGTGAAATGCGTAGAGATCTGAAGGAATACCGATGGCG  
GTGGTAGAATTTTCAGGTGTAGCGGTGAAATGCGTAGAGATCTGAAGGAATACCGATGGCG  
GTGGTAGAATTTTCAGGTGTAGCGGTGAAATGCGTAGAGATCTGAAGGAATACCGATGGCG  
GTGGTAGAATTTTCAGGTGTAGCGGTGAAATGCGTAGAGATCTGAAGGAATACCGATGGCG  
\*\*\*\*\*

Pseudoalteromonas\_mariniglutinos  
Pseudoalteromonas\_arabiensis\_S00  
Pseudoalteromonas\_lipolytica\_S00  
Pseudoalteromonas\_donghaensis\_S0

AAGGCAGCCACCTGGGTCAACACTGACGCTCATGTACGAAAGCGTGGGGAGCAAACAGGA  
AAGGCAGCCACCTGGGTCAACACTGACGCTCATGTACGAAAGCGTGGGGAGCAAACAGGA  
AAGGCAGCCACCTGGGTCAACACTGACGCTCATGTACGAAAGCGTGGGGAGCAAACAGGA  
AAGGCAGCCACCTGGGTCAACACTGACGCTCATGTACGAAAGCGTGGGGAGCAAACAGGA  
\*\*\*\*\*

Pseudoalteromonas\_mariniglutinos  
Pseudoalteromonas\_arabiensis\_S00  
Pseudoalteromonas\_lipolytica\_S00  
Pseudoalteromonas\_donghaensis\_S0

TTAGATACCCTGGTAGTCCACGCCGTAAACGATGTCTACTAGAAGCTCGGTTCCCTCGGAA  
TTAGATACCCTGGTAGTCCACGCCGTAAACGATGTCTACTAGAAGCTCGACTCTTCGGAG  
TTAGATACCCTGGTAGTCCACGCCGTAAACGATGTCTACTAGAAGCTCGGTTCCCTCGGAA  
TTAGATACCCTGGTAGTCCACGCCGTAAACGATGTCTACTAGAAGCTCGGTTCCCTCGGAA  
\*\*\*\*\* \*\* \*\*\*\*\*

Pseudoalteromonas\_mariniglutinos  
Pseudoalteromonas\_arabiensis\_S00  
Pseudoalteromonas\_lipolytica\_S00  
Pseudoalteromonas\_donghaensis\_S0

CTGTTTTTCAAAGCTAACGCATTAAGTAGACCGCTGGGGAGTACGGCCGAAGGTAAAA  
TTGTTTTTCAAAGCTAACGCATTAAGTAGACCGCTGGGGAGTACGGCCGAAGGTAAAA  
CTGTTTTTCAAAGCTAACGCATTAAGTAGACCGCTGGGGAGTACGGCCGAAGGTAAAA  
CTGTTTTTCAAAGCTAACGCATTAAGTAGACCGCTGGGGAGTACGGCCGAAGGTAAAA  
\*\*\*\*\*

Pseudoalteromonas\_mariniglutinos  
Pseudoalteromonas\_arabiensis\_S00  
Pseudoalteromonas\_lipolytica\_S00  
Pseudoalteromonas\_donghaensis\_S0

ACTCAAATGAATTGACGGGGGCCCGCACAAAGCGGTGGAGCATGTGGTTTAATTCGATGCA  
ACTCAAATGAATTGACGGGGGCCCGCACAAAGCGGTGGAGCATGTGGTTTAATTCGATGCA  
ACTCAAATGAATTGACGGGGGCCCGCACAAAGCGGTGGAGCATGTGGTTTAATTCGATGCA  
ACTCAAATGAATTGACGGGGGCCCGCACAAAGCGGTGGAGCATGTGGTTTAATTCGATGCA  
\*\*\*\*\*

Pseudoalteromonas\_mariniglutinos  
Pseudoalteromonas\_arabiensis\_S00  
Pseudoalteromonas\_lipolytica\_S00  
Pseudoalteromonas\_donghaensis\_S0

ACGCGAAGAACCTTACCTACACTTGACATACAGAGAACTTACTAGAGATGGTTTGGTGCC  
ACGCGAAGAACCTTACCTACACTTGACATACAGAGAACTTACTAGAGATAGTTTGGTGCC  
ACGCGAAGAACCTTACCTACACTTGACATACAGAGAACTTACCAGAGATGGTTTGGTGCC  
ACGCGAAGAACCTTACCTACACTTGACATACAGAGAACTTACCAGAGATGGTTTGGTGCC  
\*\*\*\*\* \*\*\*\*\* \*\*\*\*\* \*\*\*\*\*

Pseudoalteromonas\_mariniglutinos  
Pseudoalteromonas\_arabiensis\_S00  
Pseudoalteromonas\_lipolytica\_S00  
Pseudoalteromonas\_donghaensis\_S0

TTCGGGAAGCTCTGATACAGGTGCTGCATGGCTGTGTCAGCTCGTGTGTGAGATGTTGG  
TTCGGGAAGCTCTGATACAGGTGCTGCATGGCTGTGTCAGCTCGTGTGTGAGATGTTGG  
TTCGGGAAGCTCTGATACAGGTGCTGCATGGCTGTGTCAGCTCGTGTGTGAGATGTTGG  
TTCGGGAAGCTCTGATACAGGTGCTGCATGGCTGTGTCAGCTCGTGTGTGARATGTTGG  
\*\*\*\*\* \*\*\*\*\*

Pseudoalteromonas\_mariniglutinos  
Pseudoalteromonas\_arabiensis\_S00  
Pseudoalteromonas\_lipolytica\_S00  
Pseudoalteromonas\_donghaensis\_S0

GTTAAGTCCC GCAACGAGCGCAACCCCTATCCTTAGTTGCTAGCAGGTAATGCTGAGAAC  
GTTAAGTCCC GCAACGAGCGCAACCCCTATCCTTAGTTGCCAGC-GATTCGGTCGGGAAC  
GTTAAGTCCC GCAACGAGCGCAACCCCTATCCTTAGTTGCCAGC-GATTCGGTCGGGAAC  
GTTAAGTCCC GCAACGAGCGCAACCCCTATCCTTAGTTGCTAGCAGGTAATGCTGAGAAC  
\*\*\*\*\* \* \* \* \* \*

Pseudoalteromonas\_mariniglutinos  
Pseudoalteromonas\_arabiensis\_S00  
Pseudoalteromonas\_lipolytica\_S00  
Pseudoalteromonas\_donghaensis\_S0

TCTAAGGAGACTGCCGGTGATAAACCGGAGGAAGGTGGGGACGACGTC AAGTCATCATGG  
TCTAAGGAGACTGCCGGTGATAAACCGGAGGAAGGTGGGGACGACGTC AAGTCATCATGG  
TCTAAGGAGACTGCCGGTGATAAACCGGAGGAAGGTGGGGACGACGTC AAGTCATCATGG  
TCTAAGGAGACTGCCGGTGATAAACCGGAGGAAGGTGGGGACGACGTC AAGTCATCATGG  
\*\*\*\*\*

Pseudoalteromonas\_mariniglutinos  
Pseudoalteromonas\_arabiensis\_S00  
Pseudoalteromonas\_lipolytica\_S00  
Pseudoalteromonas\_donghaensis\_S0

CCCTTACGTGTAGGGCTACACACGTGCTACAATGGCGCATA CAGAGTGTGCGAACCTGC  
CCCTTACGTGTAGGGCTACACACGTGCTACAATGGCGCATA CAGAGTGTGCGAACCTGC  
CCCTTACGTGTAGGGCTACACACGTGCTACAATGGCGCATA CAGAGTGTGCGAACCTGC  
CCCTTACGTGTAGGGCTACACACGTGCTACAATGGCGCATA CAGAGTGTGCGAACCTGC  
\*\*\*\*\* \*\*

Pseudoalteromonas\_mariniglutinos  
Pseudoalteromonas\_arabiensis\_S00  
Pseudoalteromonas\_lipolytica\_S00  
Pseudoalteromonas\_donghaensis\_S0

GAGAGTAAGCGAATCACTTAAAGTGCGTCGTAGTCCGGATTGGAGTCTGCAACTCGACTC  
GAGGGTAAGCGAATCACTTAAAGTGCGTCGTAGTCCGGATTGGAGTCTGCAACTCGACTC  
GAGGGTAAGCGAATCACTTAAAGTGCGTCGTAGTCCGGATTGGAGTCTGCAACTCGACTC  
GAGGGTAAGCGAATCACTTAAAGTGCGTCGTAGTCCGGATTGGAGTCTGCAACTCGACTC  
\*\*\* \*\*\*\*\*

Pseudoalteromonas\_mariniglutinos  
Pseudoalteromonas\_arabiensis\_S00  
Pseudoalteromonas\_lipolytica\_S00  
Pseudoalteromonas\_donghaensis\_S0

CATGAAGTCGGAATCGCTAGTAATCGCGTATCAGAATGACGCGGTGAATACGTTCCCGGG  
CATGAAGTCGGAATCGCTAGTAATCGCATATCAGAATGATGCGGTGAATACGTTCCCGGG  
CATGAAGTCGGAATCGCTAGTAATCGCGTATCAGAATGACGCGGTGAATACGTTCCCGGG  
CATGAAGTCGGAATCGCTAGTAATCGCGTATCAGAATGACGCGGTGAATACATTCCCGGG  
\*\*\*\*\*

Pseudoalteromonas\_mariniglutinos  
Pseudoalteromonas\_arabiensis\_S00  
Pseudoalteromonas\_lipolytica\_S00  
Pseudoalteromonas\_donghaensis\_S0

CCTTGTACACACCGCCCGTACACCATGGGAGTGGGTGCTCCAGAAGTAGATAGTCTAA  
CCTTGTACACACCGCCCGTACACCATGGGAGTGGGTGCTCCAGAAGTAGATAGTCTAA  
CCTTGTACACACCGCCCGTACACCATGGGAGTGGGTGCTCCAGAAGTAGATAGTCTAA  
CCTTGTACACACCGCCCGTACACCATGGGAGTGGGTGCTCCAGAAGTAGATAGTCTAA  
\*\*\*\*\*

Pseudoalteromonas\_mariniglutinos  
Pseudoalteromonas\_arabiensis\_S00  
Pseudoalteromonas\_lipolytica\_S00  
Pseudoalteromonas\_donghaensis\_S0

CCCTCGGGAGGACGTTTACCACGGAGTGATTCATGACTGGGGTGAAGTCGTAACAAGGTA  
CCTTCGGGAGGACGTTTACCACGGAGTGATTCATGACTGGGGTGAAGTCGTAACAAGGTA  
CCTTCGGGAGGACGTTTACCACGGAGTGATTCATGACTGGGGTGAAGTCGTAACAAGGTA  
CCTTCGGGAGGACGTTTACCACGGAGTGATTCATNANNGGGTGAAGTCGTAACAAGGTA  
\*\* \*\*\*\*\* \* \*\*\*\*\*

Pseudoalteromonas\_mariniglutinos GCCCTAGGGGAACCTGGGGCTGGATCACT  
Pseudoalteromonas\_arabiensis\_S00 GCC-----  
Pseudoalteromonas\_lipolytica\_S00 ACCG-----  
Pseudoalteromonas\_donghaensis\_S0 ACCGTA-----  
\*\*

=====  
CLUSTAL W (1.81) multiple sequence alignment

Terrisporobacter\_glycolicus\_S000 -----AACGCTGGCGGCGTGCCTAACACATGCAAGTCGAGCG  
Terrisporobacter\_mayombeii\_S00230 GAGTTTGATCCTGGCTCAGGATGAACGCTGGCGGCGTGCCTAACACATGCAAGTCGAGCG  
\*\*\*\*\*  
  
Terrisporobacter\_glycolicus\_S000 ATTCACTTCGGTGAAGAGCGGCGGACGGGTGAGTAACGCGTGGGTAACCTGCCTCATAACA  
Terrisporobacter\_mayombeii\_S00230 ATTCTCTCGGAGAAGAGCGGCGGACGGGTGAGTAACGCGTGGGTAACCTGCCTCATAACA  
\*\*\*\* \*\*\*\*\*  
  
Terrisporobacter\_glycolicus\_S000 CATGGATAACATAACCGAAAGGTATGCTAATACAGGATAATATAAGAGATTCACATGTATT  
Terrisporobacter\_mayombeii\_S00230 CATGGATAACATAACCGAAAGGTATGCTAATACAGGATGATATAAGAGATTCACATGGATT  
\*\*\*\*\*  
  
Terrisporobacter\_glycolicus\_S000 TCTTATCAAAGCTCCGGCGGTATGAGATGGACCCGCGTCTGATTAGCTAGTTGGTAAGGT  
Terrisporobacter\_mayombeii\_S00230 TCTTATCAAAGCTCCGGCGGTATGAGATGGACCCGCGTCTGATTAGCTAGTTGGTAAGGT  
\*\*\*\*\*  
  
Terrisporobacter\_glycolicus\_S000 AACGGCTTACCAAGGCGACGATCAGTAGCCGACCTGAGAGGGTGATCGGCCACATTGGAA  
Terrisporobacter\_mayombeii\_S00230 AATGGCTTACCAAGGCGACGATCAGTAGCCGACCTGAGAGGGTGATCGGCCACATTGGAA  
\*\* \*\*\*\*\*  
  
Terrisporobacter\_glycolicus\_S000 CTGAGACACGGTCCAAACTCCTACGGGAGGCAGCAGTGGGGAATATTGCACAATGGGCGA  
Terrisporobacter\_mayombeii\_S00230 CTGAGACACGGTCCAAACTCCTACGGGAGGCAGCAGTGGGGAATATTGCACAATGGGCGA  
\*\*\*\*\*  
  
Terrisporobacter\_glycolicus\_S000 AAGCCTGATGCAGCAACGCCGCGTGAGTGATGAAGGCCTTCGGGTCGTAATAACTCTGTCC  
Terrisporobacter\_mayombeii\_S00230 AAGCCTGATGCAGCAACGCCGCGTGAGTGATGAAGGCCTTCGGGTCGTAATAACTCTGTCC  
\*\*\*\*\*  
  
Terrisporobacter\_glycolicus\_S000 TCAAGGAAGATAATGACGGTACTTGAGGAGGAAGCCCCGGCTAACTACGTGCCAGCAGCC  
Terrisporobacter\_mayombeii\_S00230 TCAAGGAAGATAATGACGGTACTTGAGGAGGAAGCCCCGGCTAACTACGTGCCAGCAGCC  
\*\*\*\*\*  
  
Terrisporobacter\_glycolicus\_S000 GCGGTAATACGTAGGGGCTAGCGTTATCCGGATTACTGGGCGTAAAGGGTGCCTAGGT  
Terrisporobacter\_mayombeii\_S00230 GCGGTAATACGTAGGGGCTAGCGTTATCCGGATTACTGGGCGTAAAGGGTGCCTAGGT

```
*****
Terrisporobacter_glycolicus_S000 GGTTCCTTAAGTCAGGAGTGAAGGCTACGGCTCAACCGTAGTAAGCTCTTGAAACTGGG
Terrisporobacter_mayombeii_S00230 GGTTCCTTAAGTCAGGAGTGAAGGCTACGGCTCAACCGTAGTAAGCTCTTGAAACTGGG
*****

Terrisporobacter_glycolicus_S000 AGACTTGAGTGCAGGAGAGGAAAGTGAATTCCTAGTGTAGCGGTGAAATGCGTAGATAT
Terrisporobacter_mayombeii_S00230 AGACTTGAGTGCAGGAGAGGAAAGTGAATTCCTAGTGTAGCGGTGAAATGCGTAGATAT
*****

Terrisporobacter_glycolicus_S000 TAGGAGGAACACCAGTAGCGAAGGCGGCTTTCTGGACTGTAAGTACTGACACTGAGGCACGAA
Terrisporobacter_mayombeii_S00230 TAGGAGGAACACCAGTAGCGAAGGCGGCTTTCTGGACTGTAAGTACTGACACTGAGGCACGAA
*****

Terrisporobacter_glycolicus_S000 AGCGTGGGGAGCGAACAGGATTAGATACCCTGGTAGTCCACGCCGTAAACGATGAGTACT
Terrisporobacter_mayombeii_S00230 AGCGTGGGGAGCGAACAGGATTAGATACCCTGGTAGTCCACGCCGTAAACGATGAGTACT
*****

Terrisporobacter_glycolicus_S000 AGGTGTCGGGGGTTACCCCCCTCGGTGCCGCACGTAACGCATTAAGTACTCCGCCTGGGG
Terrisporobacter_mayombeii_S00230 AGGTGTCGGGGGTTACCCCCCTCGGTGCCGCACGTAACGCATTAAGTACTCCGCCTGGGG
*****

Terrisporobacter_glycolicus_S000 AGTACGCTCGCAAGAGTGAAGTCAAAGGAATTGACGGGGACCCGCACAAGTAGCGGAGC
Terrisporobacter_mayombeii_S00230 AGTACGCTCGCAAGAGTGAAGTCAAAGGAATTGACGGGGACCCGCACAAGTAGCGGAGC
*****

Terrisporobacter_glycolicus_S000 ATGTGGTTTAATTGCAAGCAACGCGAAGAACCCTTACCTAAGCTTGACATCCTTTTGACCG
Terrisporobacter_mayombeii_S00230 ATGTGGTTTAATTGCAAGCAACGCGAAGAACCCTTACCTAAGCTTGACATCCTTTTGACCG
*****

Terrisporobacter_glycolicus_S000 ATGCCTAATCGCATTTTCCCTTCGGGGACAGAAGTGACAGGTGGTGCATGGTTGTCGTC
Terrisporobacter_mayombeii_S00230 ATGCCTAATCGCATTTTCCCTTCGGGGACAGAAGTGACAGGTGGTGCATGGTTGTCGTC
*****

Terrisporobacter_glycolicus_S000 AGCTCGTGTGCTGAGATGTTGGGTTAAGTCCCGCAACGAGCGCAACCCTTGCCTTTAGTT
Terrisporobacter_mayombeii_S00230 AGCTCGTGTGCTGAGATGTTGGGTTAAGTCCCGCAACGAGCGCAACCCTTGCCTTTAGTT
*****

Terrisporobacter_glycolicus_S000 GCCAGCATTAAGTTGGGCACTCTAGAGGGACTGCCAGGGATAACCTGGAGGAAGGTGGGG
Terrisporobacter_mayombeii_S00230 GCCAGCATTAAGTTGGGCACTCTAGAGGGACTGCCAGGGATAACCTGGAGGAAGGTGGGG
*****

Terrisporobacter_glycolicus_S000 ATGACGTCAAATCATCATGCCCTTATGCTTAGGGCTACACACGTGCTACAATGGGTGGT
```



```

Terrisporobacter_mayombeii_S00230      ATGACGTCAAATCATCATGCCCTTATGCTTAGGGCTACACACGTGCTACAATGGGTGGT
*****
Terrisporobacter_glycolicus_S000        ACAGAGGGCAGCCAAGTCGTGAGGCCGAGCTAATCCCTTAAATGCCATTCTCAGTTCGGA
Terrisporobacter_mayombeii_S00230      ACAGAGGGCAGCCAAGTCGTGAGGCCGAGCTAATCCCTTAAA-GCCATTCTCAGTTCGGA
*****
Terrisporobacter_glycolicus_S000        TTGTAGGCTGAAACTCGCCTACATGAAGCTGGAGTTACTAGTAATCGCAGATCAGAATGC
Terrisporobacter_mayombeii_S00230      TTGTAGGCTGAAACTCGCCTACATGAAGCTGGAGTTACTAGTAATCGCAGATCAGAATGC
*****
Terrisporobacter_glycolicus_S000        TGCGGTGAATGCGTTCGCGGTCTGTACACACCGCCCGTCACACCACGGAAGTTGGGGG
Terrisporobacter_mayombeii_S00230      TGCGGTGAATGCGTTCGCGGTCTGTACACACCGCCCGTCACACCACGGAAGTTGGGGG
*****
Terrisporobacter_glycolicus_S000        CGCCCCAAGCCACTTAGCTAACCTTTTGGGAAGCGAGTGTGGAAGGTGAAATCAATAAC
Terrisporobacter_mayombeii_S00230      CGCCCCAAGCCACTTAGCTAACCTTTT--GGAAGCGAGTGTGGAAGGTGAAATCAATAAC
*****

```

```

Terrisporobacter_glycolicus_S000        TGGGGTGAAGTCGTAACAAGGTAGCCGTATCGGAAGGTGCGGCT-----
Terrisporobacter_mayombeii_S00230      TGGGGTGAAGTCGTAACAAGGTAGCCGTATCGGAAGGTGCGGCTGGATCACCTCCTT
*****

```

=====  
CLUSTAL W (1.81) multiple sequence alignment

```

Vallitalea_guaymasensis_S0032878      AGTTT-GATCCTGGCTCAGGATGAACGCTGGCGGCGTGCTTAACACATGCAAGTCGAGCG
Vallitalea_pronyensis_S003804798      AGTTTGGATCCTGGCTCAGGATGAACGCTGGCGGCGTGCTTAACACATGCAAGTCGAGCG
*****
Vallitalea_guaymasensis_S0032878      AGAAGCTATCTATTGAACCTTCGGGTGATTTAGATAGTGGAAGCGGCGGACGGGTGAGT
Vallitalea_pronyensis_S003804798      AGAACTTAAGGATGATCCTTCGGGTGATTCCTTAAGTGGACAGCGGCGGACGGGTGAGT
**** *
AACGCGTGGGTAACCTGCCCTATGCAGGGGGATAACACATTGAAAAGTGTGCTAATACCG
Vallitalea_guaymasensis_S0032878      AACGCGTGGGTAACCTGCCCTATGCAGGGGGATAACGCACTGAAAAGTGTGCTAATACCG
Vallitalea_pronyensis_S003804798      *****
Vallitalea_guaymasensis_S0032878      CATAAGACCACAGAGTCGCATGACTCAGTGGTAAAAACTCCGGTAGCATAGGATGGACCC
Vallitalea_pronyensis_S003804798      CATAAGACCACAGGATCACATGATCTGGTGGTAAAAACTCCGGTGGCATAGGATGGACCC
*****

```

Vallitalea\_guaymasensis\_S0032878  
Vallitalea\_pronyensis\_S003804798  
CGCTCTGATTAGCTAGTAGGTAAGGTAACGGCTTACCTAGGCGACGATCAGTAGCCGACC  
CGCTCTGATTAGCTAGTAGGTAGGTAACGGCTCACCTAGGCGACGATCAGTAGCCGACC  
\*\*\*\*\*

Vallitalea\_guaymasensis\_S0032878  
Vallitalea\_pronyensis\_S003804798  
TGAGAGGGTGATCGGCCACATTGGGACTGAGACACGGCCCAAACCTCCTACGGGAGGCAGC  
TGAGAGGGTGATCGGCCACATTGGGACTGAGACACGGCCCAAACCTCCTACGGGAGGCAGC  
\*\*\*\*\*

Vallitalea\_guaymasensis\_S0032878  
Vallitalea\_pronyensis\_S003804798  
AGTGGGGAATATTGCACAATGGGGAAACCCTGATGCAGCGACGCCGCGTGAAGGAAGAA  
AGTGGGGAATATTGCACAATGGGGAAACCCTGATGCAGCGACGCCGCGTGAAGGAAGAA  
\*\*\*\*\*

Vallitalea\_guaymasensis\_S0032878  
Vallitalea\_pronyensis\_S003804798  
GGTTTTCGGATCGTAAACTTCTATCAGCAGGGAAGATAGTGACAGTACCTGACTAAGAAG  
GGTTTTCGGATCGTAAACTTCTATCAGCAGGGAAGATAGTGACAGTACCTGACTAAGAAG  
\*\*\*\*\*

Vallitalea\_guaymasensis\_S0032878  
Vallitalea\_pronyensis\_S003804798  
CCCCGGCTAACTACGTGCCAGCAGCCGCGGTAATACGTAGGGGGCAAGCGTTATCCGGAT  
CCCCGGCTAACTACGTGCCAGCAGCCGCGGTAATACGTAGGGGGCAAGCGTTATCCGGAT  
\*\*\*\*\*

Vallitalea\_guaymasensis\_S0032878  
Vallitalea\_pronyensis\_S003804798  
TTACTGGGTGTAAAGGGTGCCTAGGCGGCGAAGTAAGTCAGATGTGAAAGCCCGAGGCTC  
TTACTGGGTGTAAAGGGTGCCTAGGCGGCGGAGTAAGTCAGATGTGAAAGCCCGAGGCTC  
\*\*\*\*\*

Vallitalea\_guaymasensis\_S0032878  
Vallitalea\_pronyensis\_S003804798  
AACCTCGGGACTGCATTTGAAACTGCTTTGCTAGAGTGCAGGAGAGGAAAGCGGAATTCC  
AACCTCGGGACTGCATTTGAAACTGCTTTGCTAGAGTGCAGGAGAGGAAAGTGAATTCC  
\*\*\*\*\*

Vallitalea\_guaymasensis\_S0032878  
Vallitalea\_pronyensis\_S003804798  
TAGTGTAGCGGTGAAATGCGTAGATATTAGGAGGAACACCAGTGGCGAAGGCAGCTTTCT  
TAGTGTAGCGGTGAAATGCGTAGATATTAGGAGGAACACCAGTGGCGAAGGCAGCTTTCT  
\*\*\*\*\*

Vallitalea\_guaymasensis\_S0032878  
Vallitalea\_pronyensis\_S003804798  
GGACTGTAACGTACGCTGAGGCACGAAAGCGTGGGGAGCGAACAGGATTAGATACCCTGG  
GGACTGTAACGTACGCTGAGGCACGAAAGCGTGGGGAGCGAACAGGATTAGATACCCTGG  
\*\*\*\*\*

Vallitalea\_guaymasensis\_S0032878  
Vallitalea\_pronyensis\_S003804798  
TAGTCCACGCCGTAACGATGAATGCTAGGTGTCGGGGTTCGAACCTCGGTGCCGAGCA  
TAGTCCACGCCGTAACGATGAATGCTAGGTGTCGGGGTTCGAACCTCGGTGCCGAGCA  
\*\*\*\*\*

Vallitalea\_guaymasensis\_S0032878  
Vallitalea\_pronyensis\_S003804798  
AACGCATTAAGCATTCCACCTGGGGAGTACGATCGCAAGATTGAAACTCAAAGGAATTGA  
AACGCATTAAGCATTCCACCTGGGGAGTACGATCGCAAGATTGAAACTCAAAGGAATTGA

```

*****
Vallitalea_guaymasensis_S0032878 CCGGGGCCCGCACAAGCGGTGGAGCATGTGGTTAATTCGAAGCAACCGAAGAACCTTA
Vallitalea_pronyensis_S003804798 CCGGGGCCCGCACAAGCGGTGGAGCATGTGGTTAATTCGAAGCAACCGAAGAACCTTA
*****

Vallitalea_guaymasensis_S0032878 CCAAATCTTGACATCCTTCTGACCGTTCCTTAATCGGAAC TTCCTTCGGGACAGAAGAG
Vallitalea_pronyensis_S003804798 CCAAATCTTGACATCCTTCTGACCGTTCCTTAATCGGAAC TTCCTTCGGGACAGAAGAG
*****

Vallitalea_guaymasensis_S0032878 ACAGGTGGTGCATGGTTGT CGTCAGCTCGTGTCTGAGATGTTGGGTTAAGTCCCGCAAC
Vallitalea_pronyensis_S003804798 ACAGGTGGTGCATGGTTGT CGTCAGCTCGTGTCTGAGATGTTGGGTTAAGTCCCGCAAC
*****

Vallitalea_guaymasensis_S0032878 GAGCGCAACCCTTATCTTTAGTAGCCAGCAAGTTAAGTTGGGGACTCTAGAGAGACTGCC
Vallitalea_pronyensis_S003804798 GAGCGCAACCCTTATCTTTAGTAGCCAGCAAGTTAAGTTGGGGACTCTAGAGAGACTGCC
*****

Vallitalea_guaymasensis_S0032878 GGGGACAACCTCGGAGGAAGGTGGGGATGACGTCAAATCATCATGCCCTTATGATTTGGG
Vallitalea_pronyensis_S003804798 GGGGACAACCTCGGAGGAAGGTGGGGATGACGTCAAATCATCATGCCCTTATGATTTGGG
*****

Vallitalea_guaymasensis_S0032878 CTACACACGTGCTACAATGGCGGTGACAAAGGAAGCAAAATGGTGACATGGAGCAAATC
Vallitalea_pronyensis_S003804798 CTACACACGTGCTACAATGGTAGTGACAAAGGAAGCGAAGTGGTGACATGGAGCCAACC
*****

Vallitalea_guaymasensis_S0032878 CCAAAAAAGCCGTCCCAGTTCGGATTGTAGTCTGCAACTCGACTACATGAAGTTGGAATC
Vallitalea_pronyensis_S003804798 CCAAAAAAGCTATCCCAGTTCGGATTGTAGTCTGCAACTCGACTACATGAAGTTGGAATC
*****

Vallitalea_guaymasensis_S0032878 GCTAGTAATCGCGAATCAGAATGTCGCGGTGAATACGTTCCCGGGCCTTGTACACACCGC
Vallitalea_pronyensis_S003804798 GCTAGTAATCGCGAATCAGCATGTCGCGGTGAATACGTTCCCGGGCCTTGTACACACCGC
*****

Vallitalea_guaymasensis_S0032878 CCGTCACACCATGGGAG-TGGAAGCGCCGAAGCCAG-GACTCAAC--GCAAAGAGAGAG
Vallitalea_pronyensis_S003804798 CCGTCACACACGGGAGTTGGAAGCGCCGAAGCCAGTGACCAAACCTTATGGATGGAG
*****

Vallitalea_guaymasensis_S0032878 CT-TCGAAGG-----
Vallitalea_pronyensis_S003804798 CTGTCCAAGGTGAAGCCGATGACTGGGGTGAAGTCGTAAC
** ** ****

```
